# Supplementary material
Source: PubMed Central journal article supplement (PMC4636954)
Supplement: NIHMS719884-supplement-1.pdf [file NIHMS719884-supplement-1.pdf]

*Supplementary Information*

***In Vitro* Opioid Receptor Affinity and *in Vivo* Behavioral Studies of *Nelumbo nucifera* Flower**

Mallika Kumarihamy<sup>a</sup>, Francisco León<sup>b</sup>, Sara Pettaway<sup>b</sup>, Lisa Wilson<sup>b</sup>, Janet Lambert<sup>b</sup>, Mei Wang<sup>a</sup>, Christopher Hill<sup>a</sup>, Christopher R. McCurdy<sup>b</sup>, Mahmoud ElSohly<sup>a,c</sup>, Stephen J. Cutler<sup>a,b</sup>, Ilias Muhammad<sup>a,\*</sup>

<sup>a</sup>*National Center for Natural Products Research, School of Pharmacy, Research Institute of Pharmaceutical Sciences, University of Mississippi, University, MS 38677, USA*

<sup>b</sup>*Department of BioMolecular Sciences, School of Pharmacy, Research Institute of Pharmaceutical Sciences, University of Mississippi, University, MS 38677, USA*

<sup>c</sup>*Department of Pharmaceutics and Drug Delivery, School of Pharmacy, Research Institute of Pharmaceutical Sciences, University of Mississippi, University, MS 38677, USA*

-----  
\* Corresponding author. Tel.: +1 662 915 1051; fax: +1 662 915 1006.  
E-mail address: [milias@olemiss.edu](mailto:milias@olemiss.edu) (I. Muhammad).

## Table of Content

|                                                                                                     | Page |
|-----------------------------------------------------------------------------------------------------|------|
| Figure 1S. <sup>1</sup> H NMR spectrum of nuciferine (1).                                           | 4    |
| Figure 2S. <sup>13</sup> C NMR spectrum of nuciferine (1).                                          | 5    |
| Figure 3S. <sup>1</sup> H NMR spectrum of <i>nor</i> -nuciferine (2).                               | 6    |
| Figure 4S. <sup>13</sup> C NMR spectrum of <i>nor</i> -nuciferine (2).                              | 7    |
| Figure 5S. <sup>1</sup> H NMR spectrum of asimilobine (3).                                          | 8    |
| Figure 6S. <sup>13</sup> C NMR spectrum of asimilobine (3).                                         | 9    |
| Figure 7S. <sup>1</sup> H NMR spectrum of armepavine (4).                                           | 10   |
| Figure 8S. <sup>13</sup> C NMR spectrum of armepavine (4).                                          | 11   |
| Figure 9S. <sup>1</sup> H NMR spectrum of <i>O</i> -methylcoclaurine (5).                           | 12   |
| Figure 10S. <sup>13</sup> C NMR spectrum of <i>O</i> -methylcoclaurine (5).                         | 13   |
| Figure 11S. <sup>1</sup> H NMR spectrum of <i>N</i> -methylcoclaurine (6).                          | 14   |
| Figure 12S. <sup>13</sup> C NMR spectrum of <i>N</i> -methylcoclaurine (6).                         | 15   |
| Figure 13S. <sup>1</sup> H NMR spectrum of coclaurine (7).                                          | 16   |
| Figure 14S. <sup>13</sup> C NMR spectrum of coclaurine (7).                                         | 17   |
| Figure 15S. <sup>1</sup> H NMR spectrum of higenamine (8).                                          | 18   |
| Figure 16S. <sup>13</sup> C NMR spectrum of higenamine (11).                                        | 19   |
| Figure 17S. <sup>1</sup> H NMR spectrum of higenamine derivative 12.                                | 20   |
| Figure 18S. <sup>1</sup> H NMR spectrum of higenamine derivative 13.                                | 21   |
| Figure 19S. UHPLC-UV (280 nm) chromatogram of basic partition of <i>N. nucifera</i> white flower    | 22   |
| Figure 20S. UHPLC- ESI Positive chromatogram of basic partition of <i>N. nucifera</i> white flower  | 23   |
| Figure 21S. UHPLC-UV (280 nm) chromatogram of basic partition of <i>N. nucifera</i> pink flower     | 24   |
| Figure 22S. UHPLC- ESI Positive chromatogram of basic partition of <i>N. nucifera</i> pink flower.  | 25   |
| Figure 23S. UHPLC-UV (280 nm) chromatogram of acidic partition of <i>N. nucifera</i> white flower   | 26   |
| Figure 24S. UHPLC- ESI Positive chromatogram of acidic partition of <i>N. nucifera</i> white flower | 27   |
| Figure 25S. UHPLC-UV (280 nm) chromatogram of acidic partition of <i>N. nucifera</i> pink flower    | 28   |
| Figure 26S. UHPLC- ESI Positive chromatogram of acidic partition of <i>N. nucifera</i> pink flower  | 29   |

|                                                                                                          |    |
|----------------------------------------------------------------------------------------------------------|----|
| Figure 27S. GC/MS analysis of palmitic acid Me ester (Std)                                               | 30 |
| Figure 28S. GC/MS analysis of linolic acid Me ester (Std)                                                | 30 |
| Figure 29S. GC/MS analysis of acidic patition (white flower)                                             | 30 |
| Figure 30S. GC/MS analysis of acidic patition (pink flower)                                              | 30 |
| Figure 31S. GC/MS analysis of fraction G                                                                 | 31 |
| Figure 32S. GC/MS analysis of fraction H                                                                 | 32 |
| Figure 33S. <i>In vivo</i> mouse tetrad assay of acidic partition of <i>N. nucifera</i>                  | 33 |
| Figure 34S. <i>In vivo</i> mouse tetrad assay of basic partition of <i>N. nucifera</i>                   | 34 |
| Figure 35S. <i>In vivo</i> mouse tetrad assay of mixture of compound <b>5-7</b> of<br><i>N. nucifera</i> | 35 |
| Figure 36S. <i>In vivo</i> mouse tetrad assay of coclaurine ( <b>7</b> )                                 | 36 |
| Figure 37S. <i>In vivo</i> mouse tetrad assay of nuciferine ( <b>1</b> )                                 | 37 |
| Figure 38S. Structure of alkaloids and their analogs from <i>N. nucifera</i>                             | 38 |

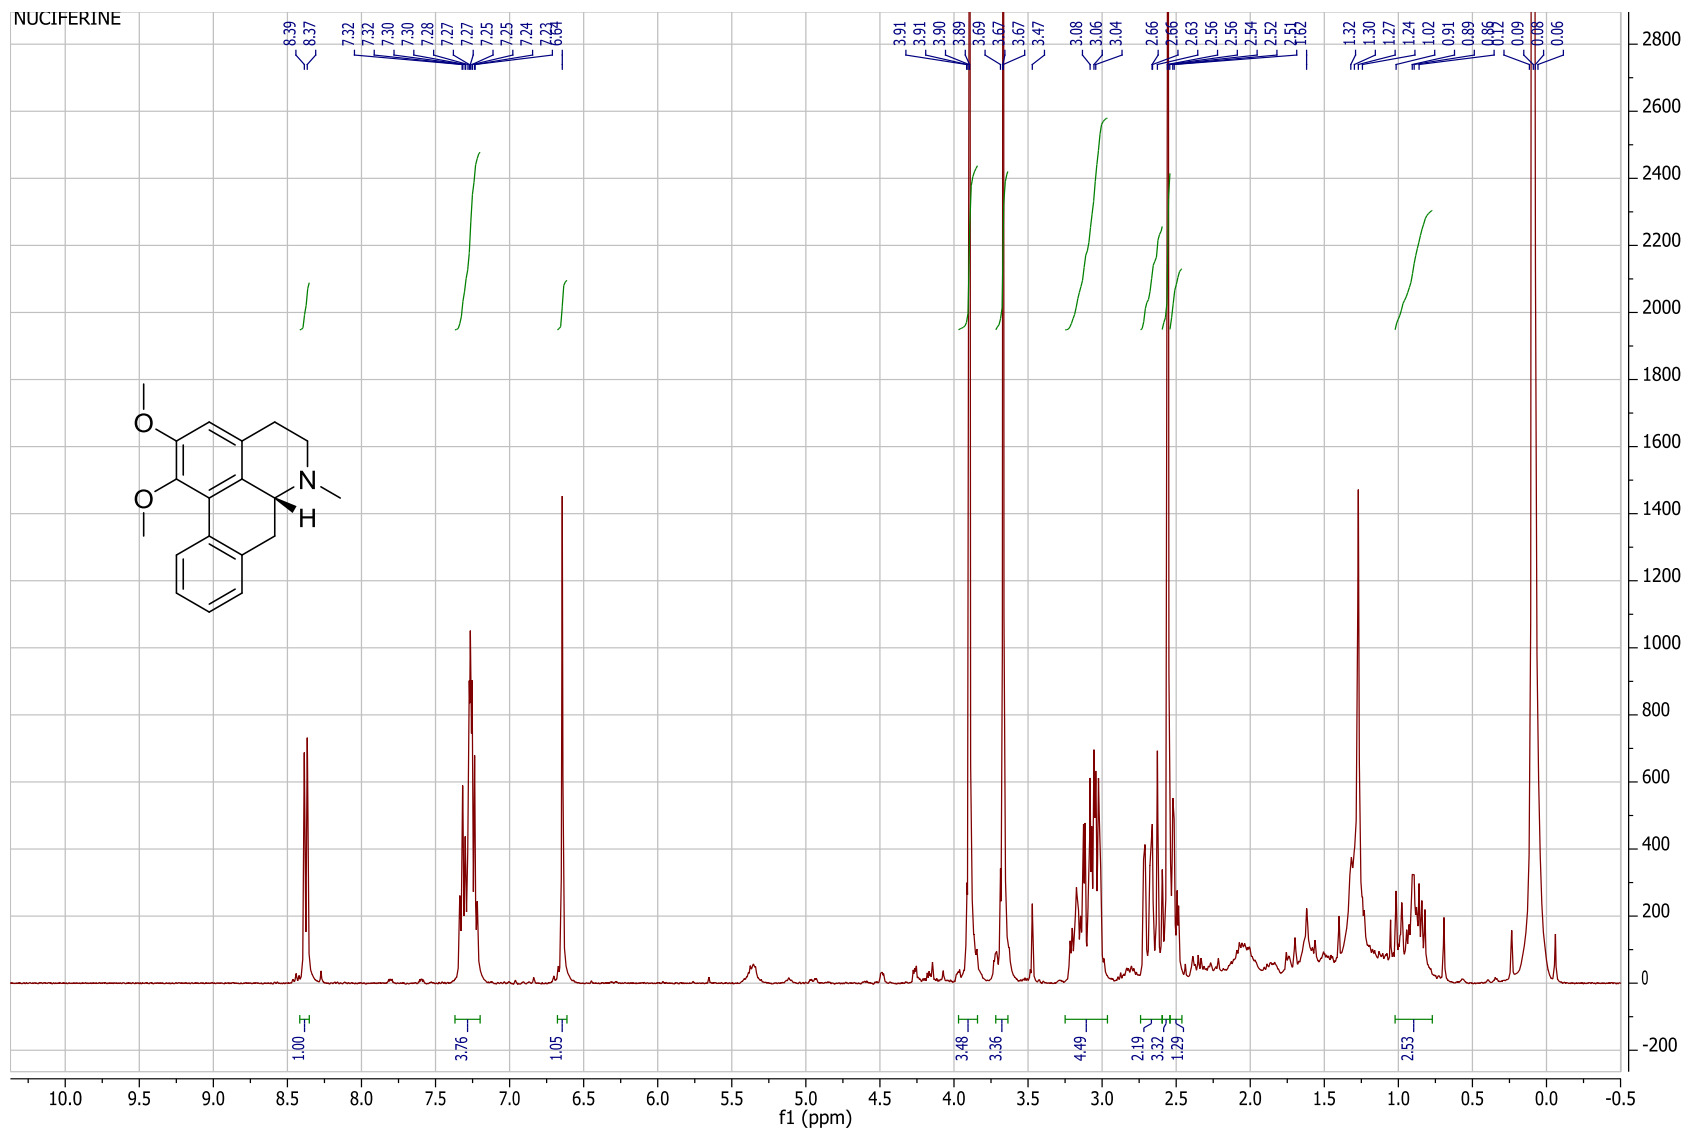

Figure 1S.  $^1\text{H}$  NMR spectrum of nuciferine (1).

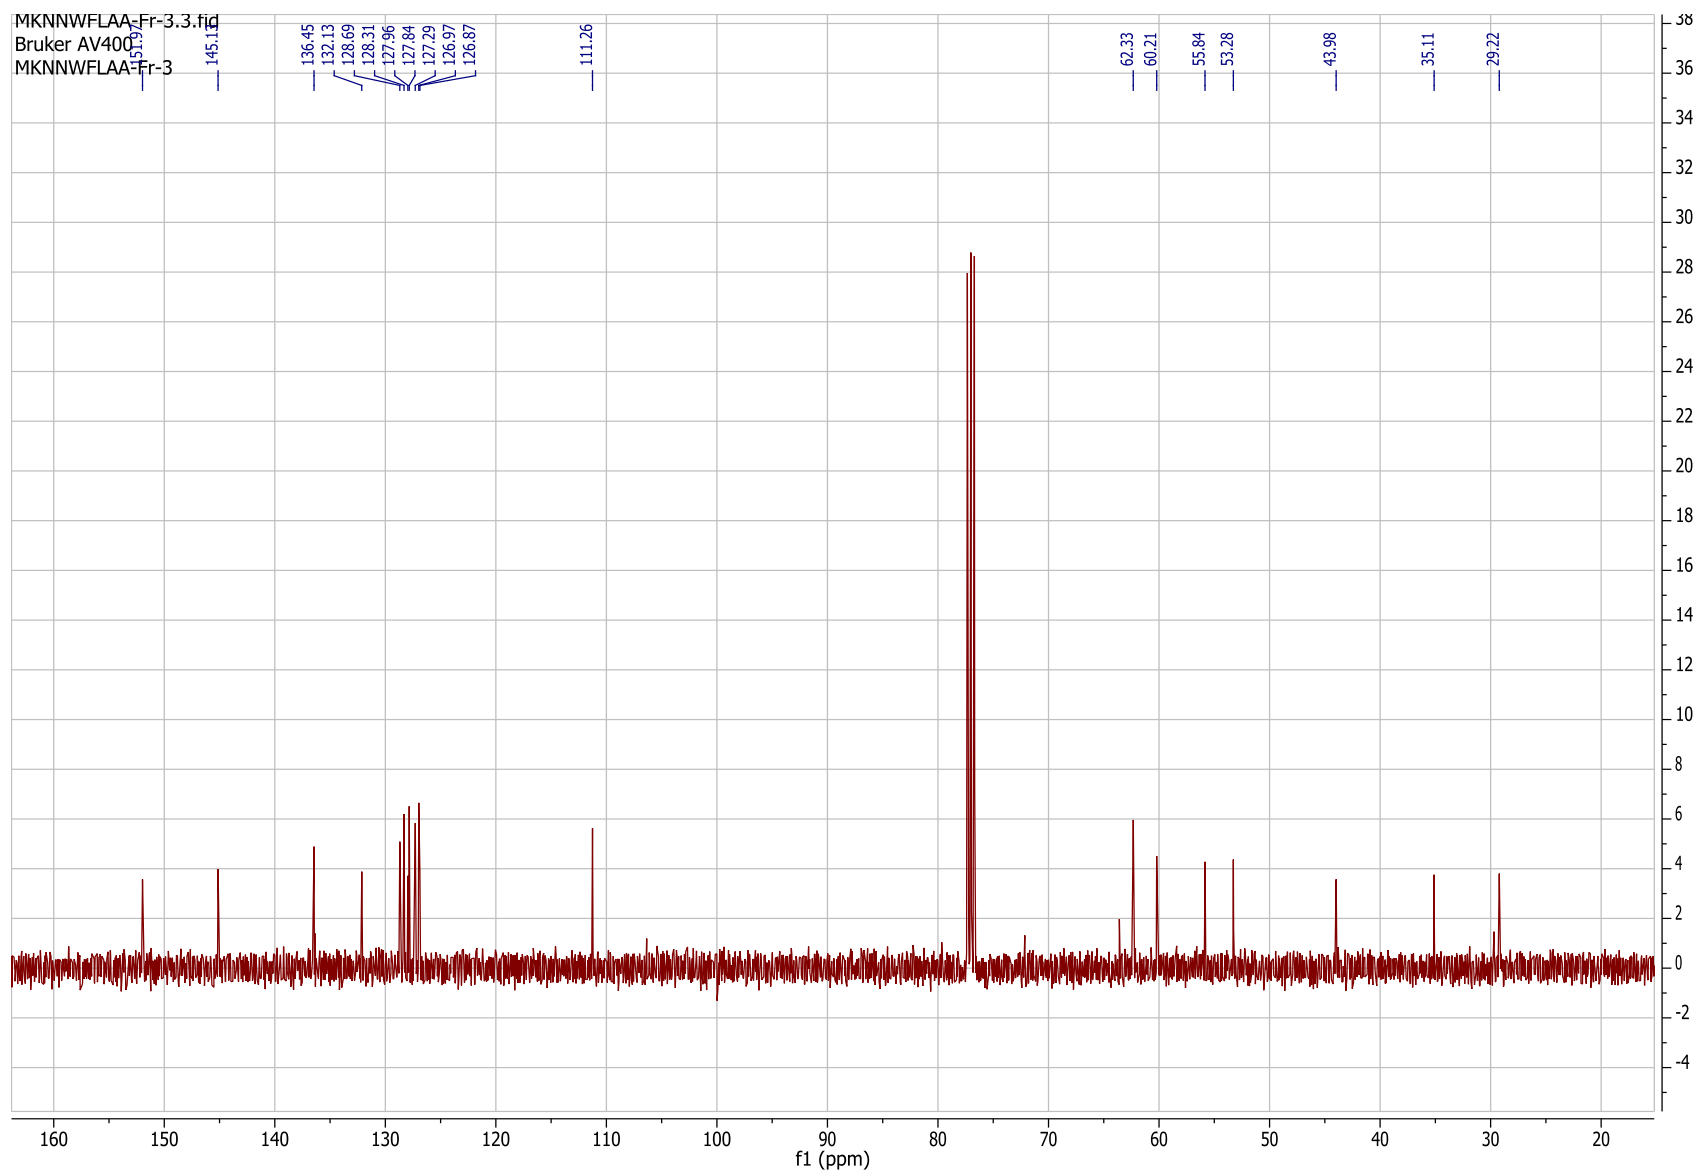

**Figure 2S.**  $^{13}\text{C}$  NMR spectrum of nuciferine (**1**).

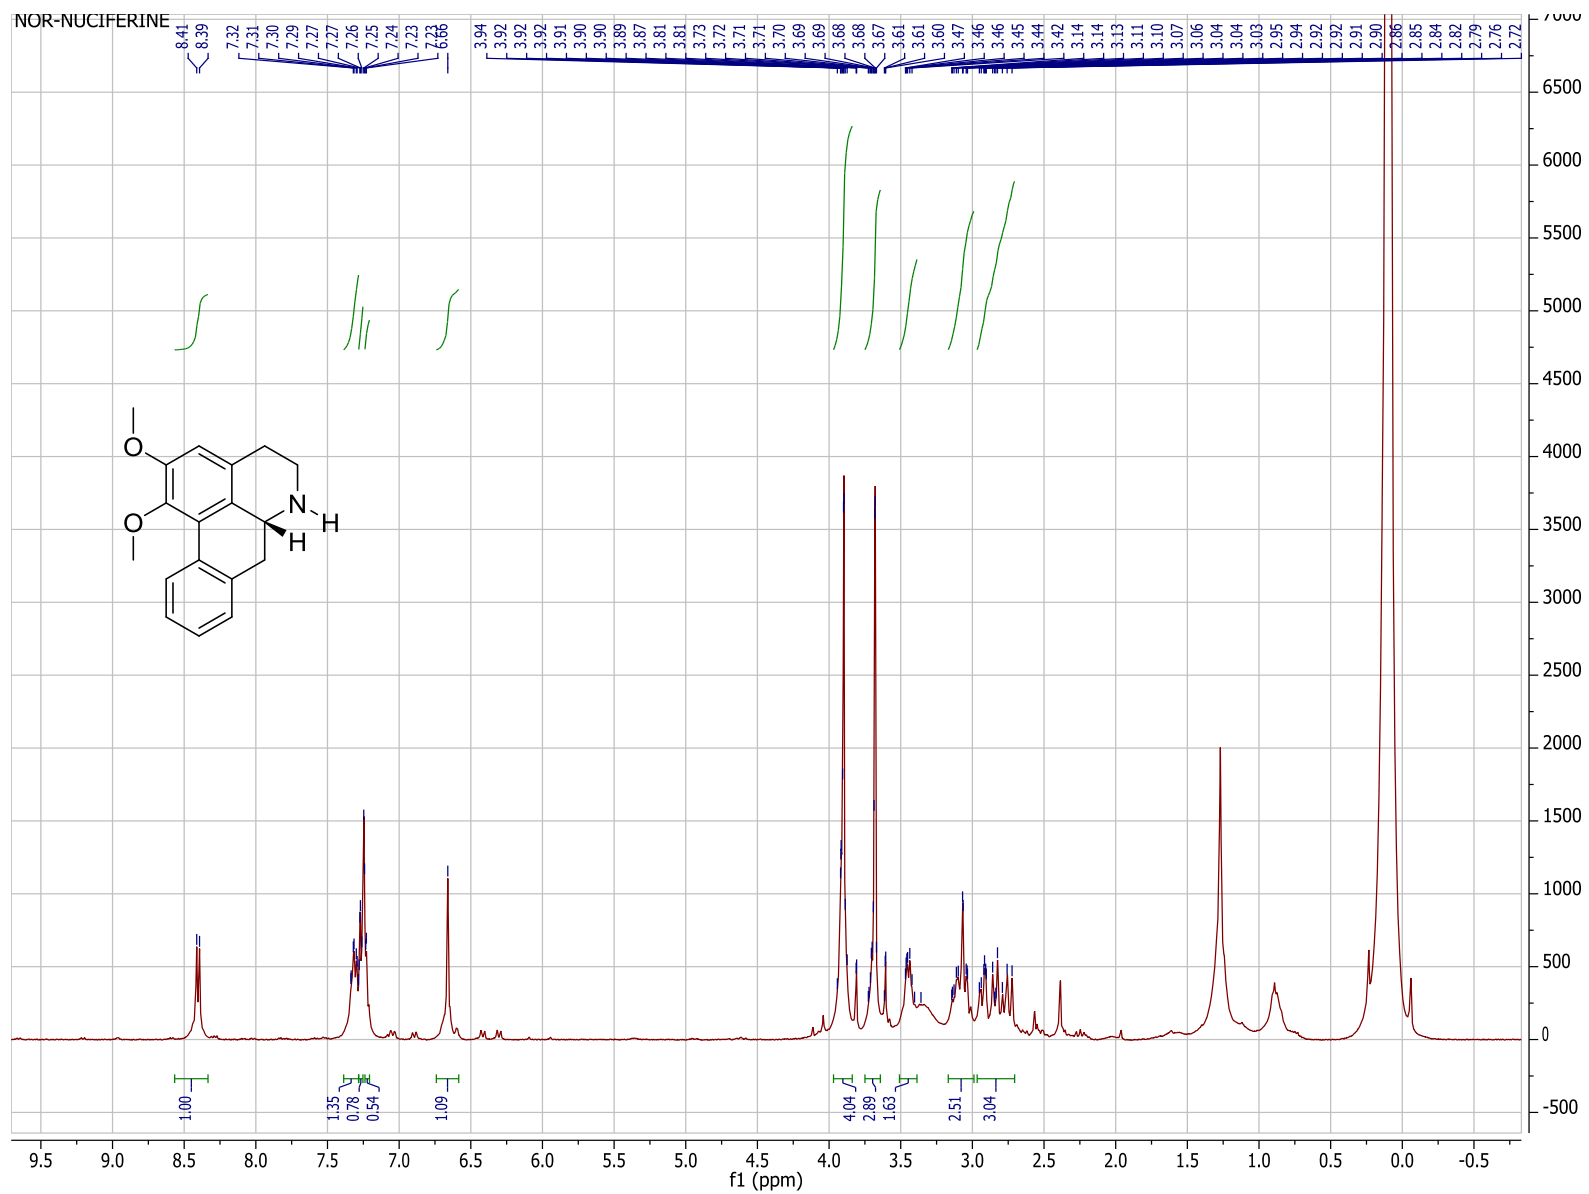

Figure 3S.  $^1\text{H}$  NMR spectrum of nor-nuciferine (2).

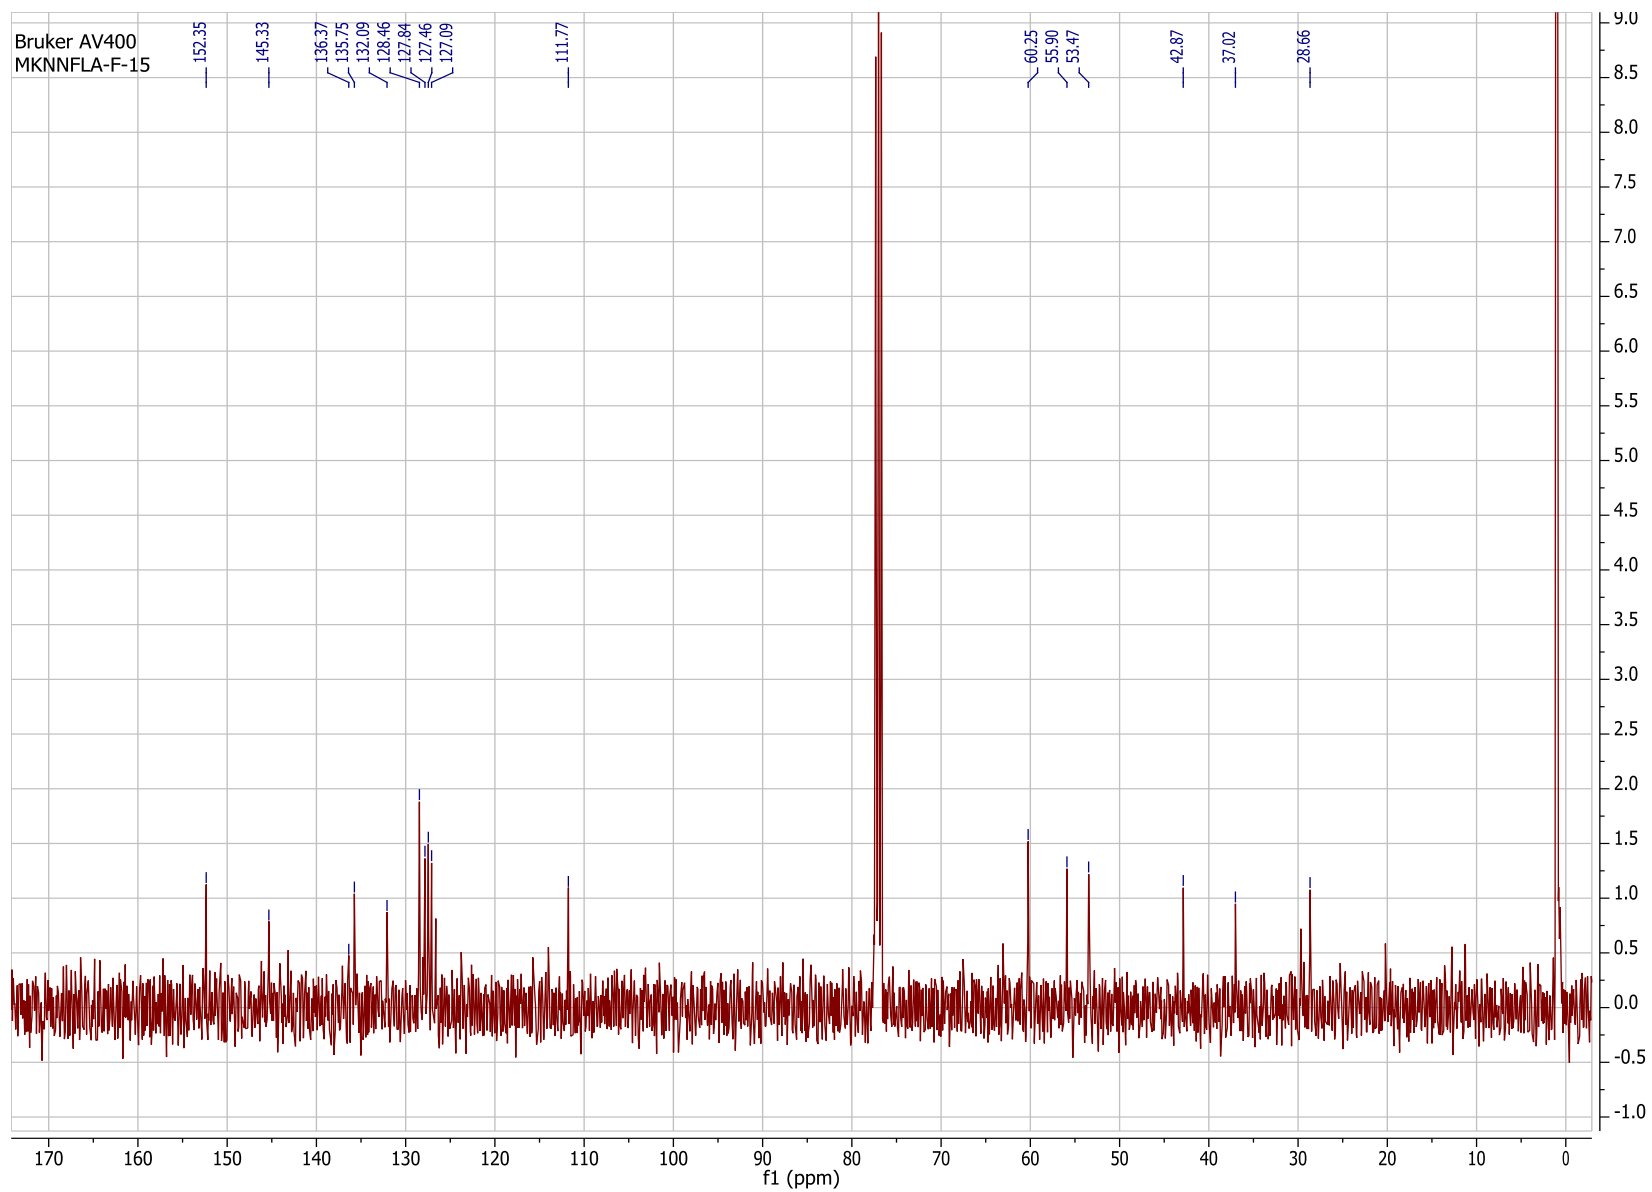

**Figure 4S.**  $^{13}\text{C}$  NMR spectrum of nor-nuciferine (**2**).

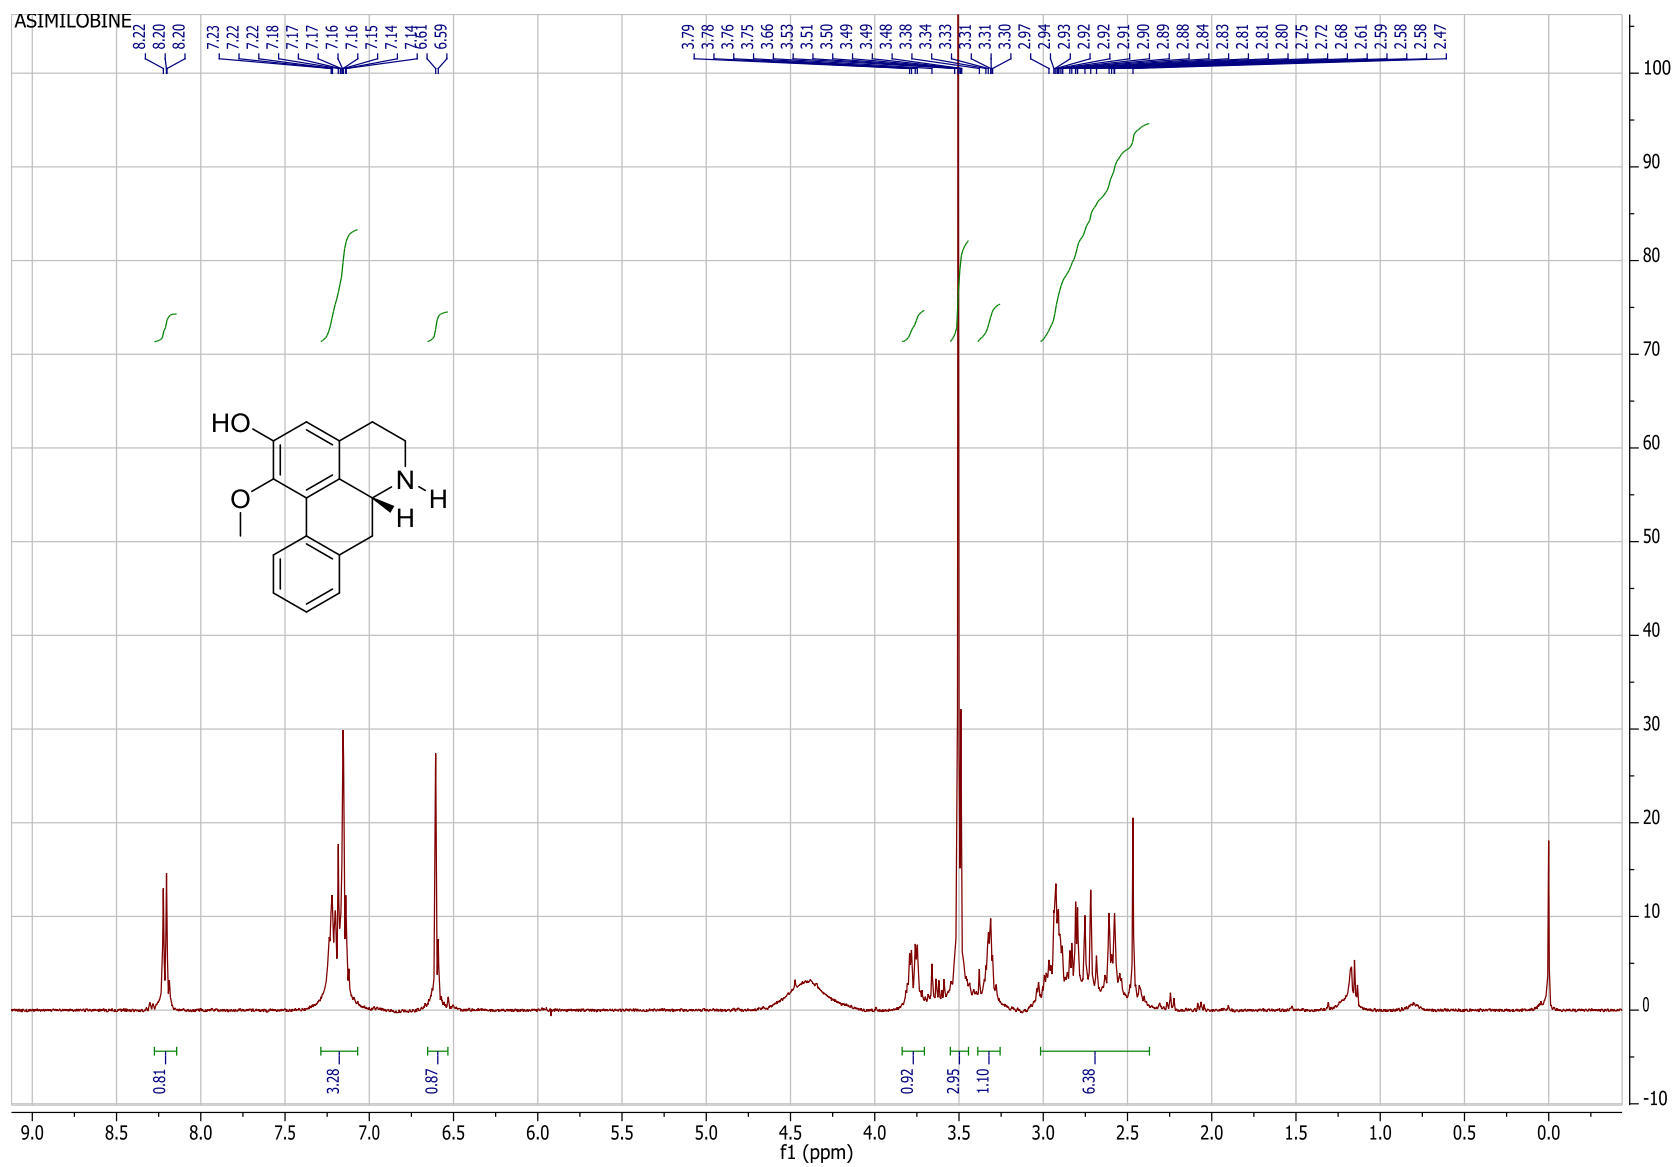

Figure 5S. <sup>1</sup>H NMR spectrum of asimilobine (3).



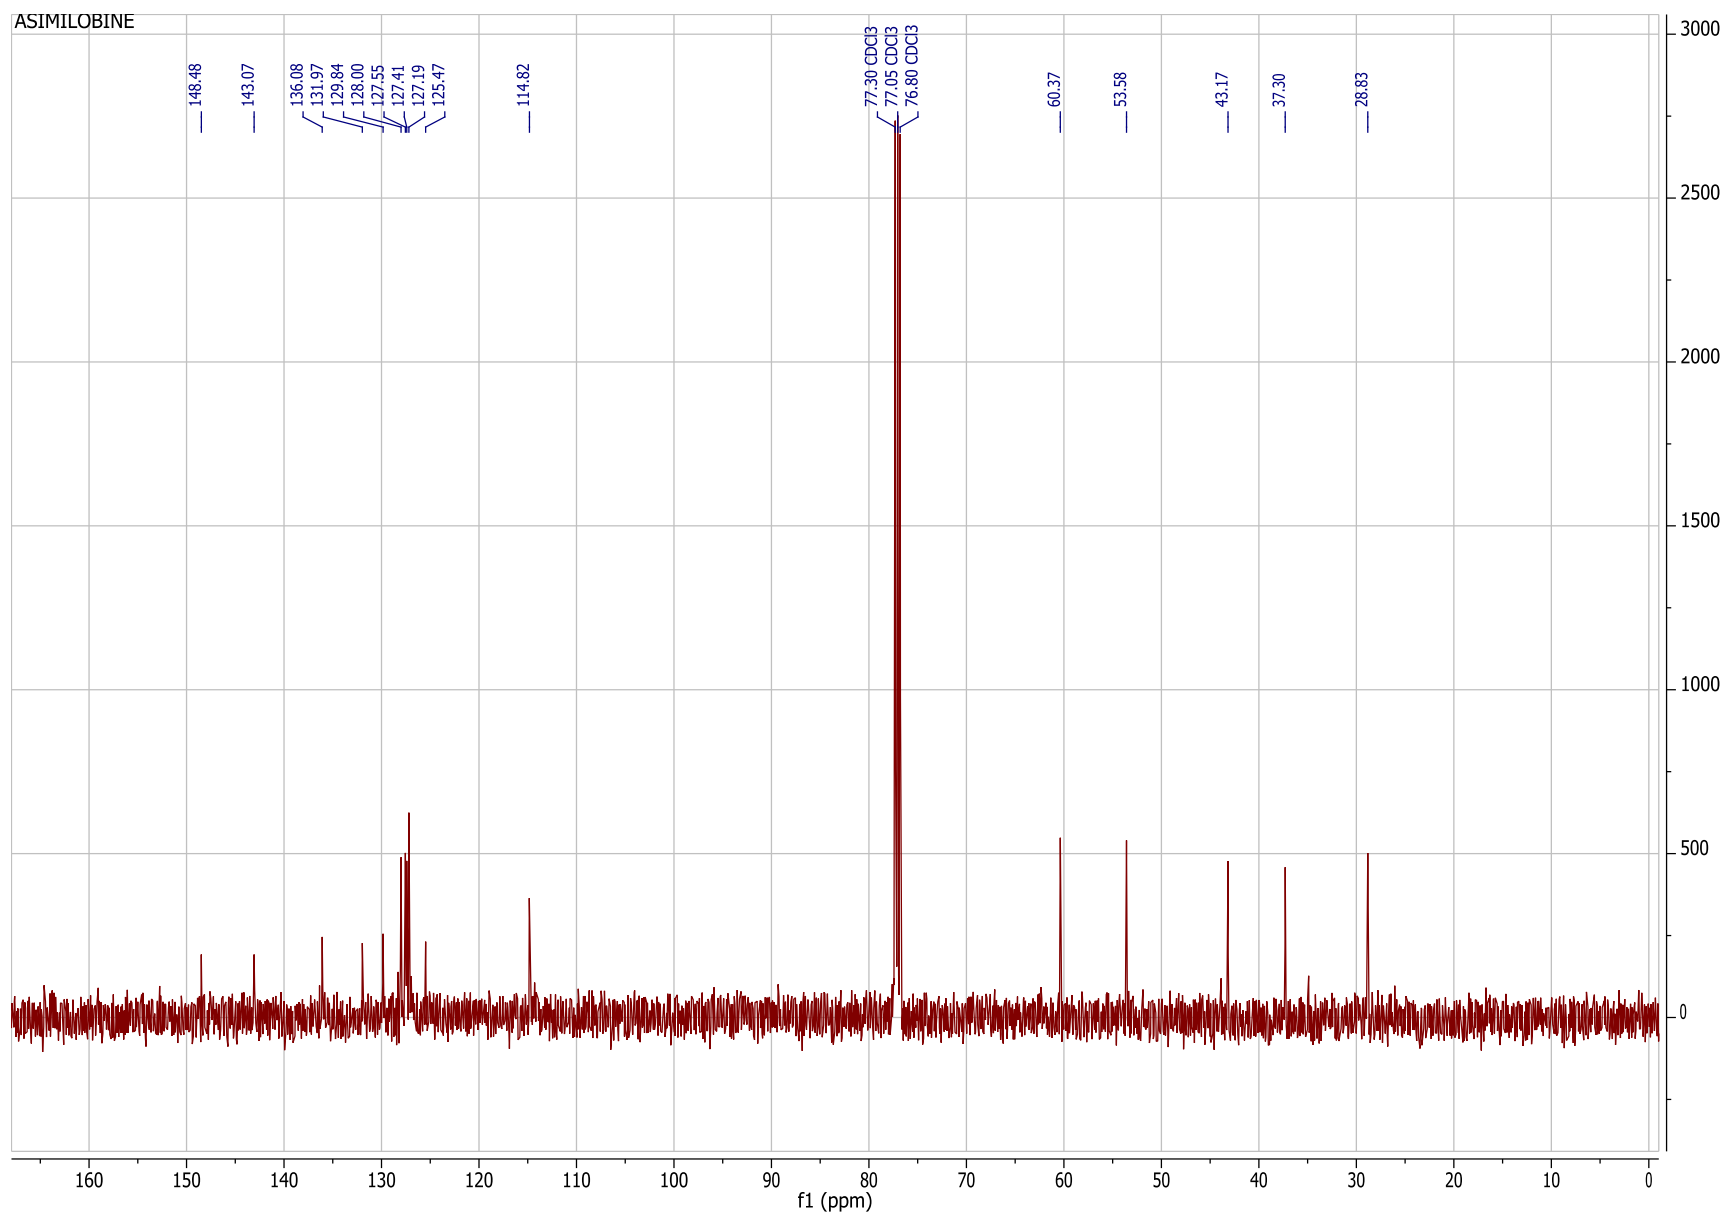

**Figure 6S.** <sup>13</sup>C NMR spectrum of asimilobine (**3**).

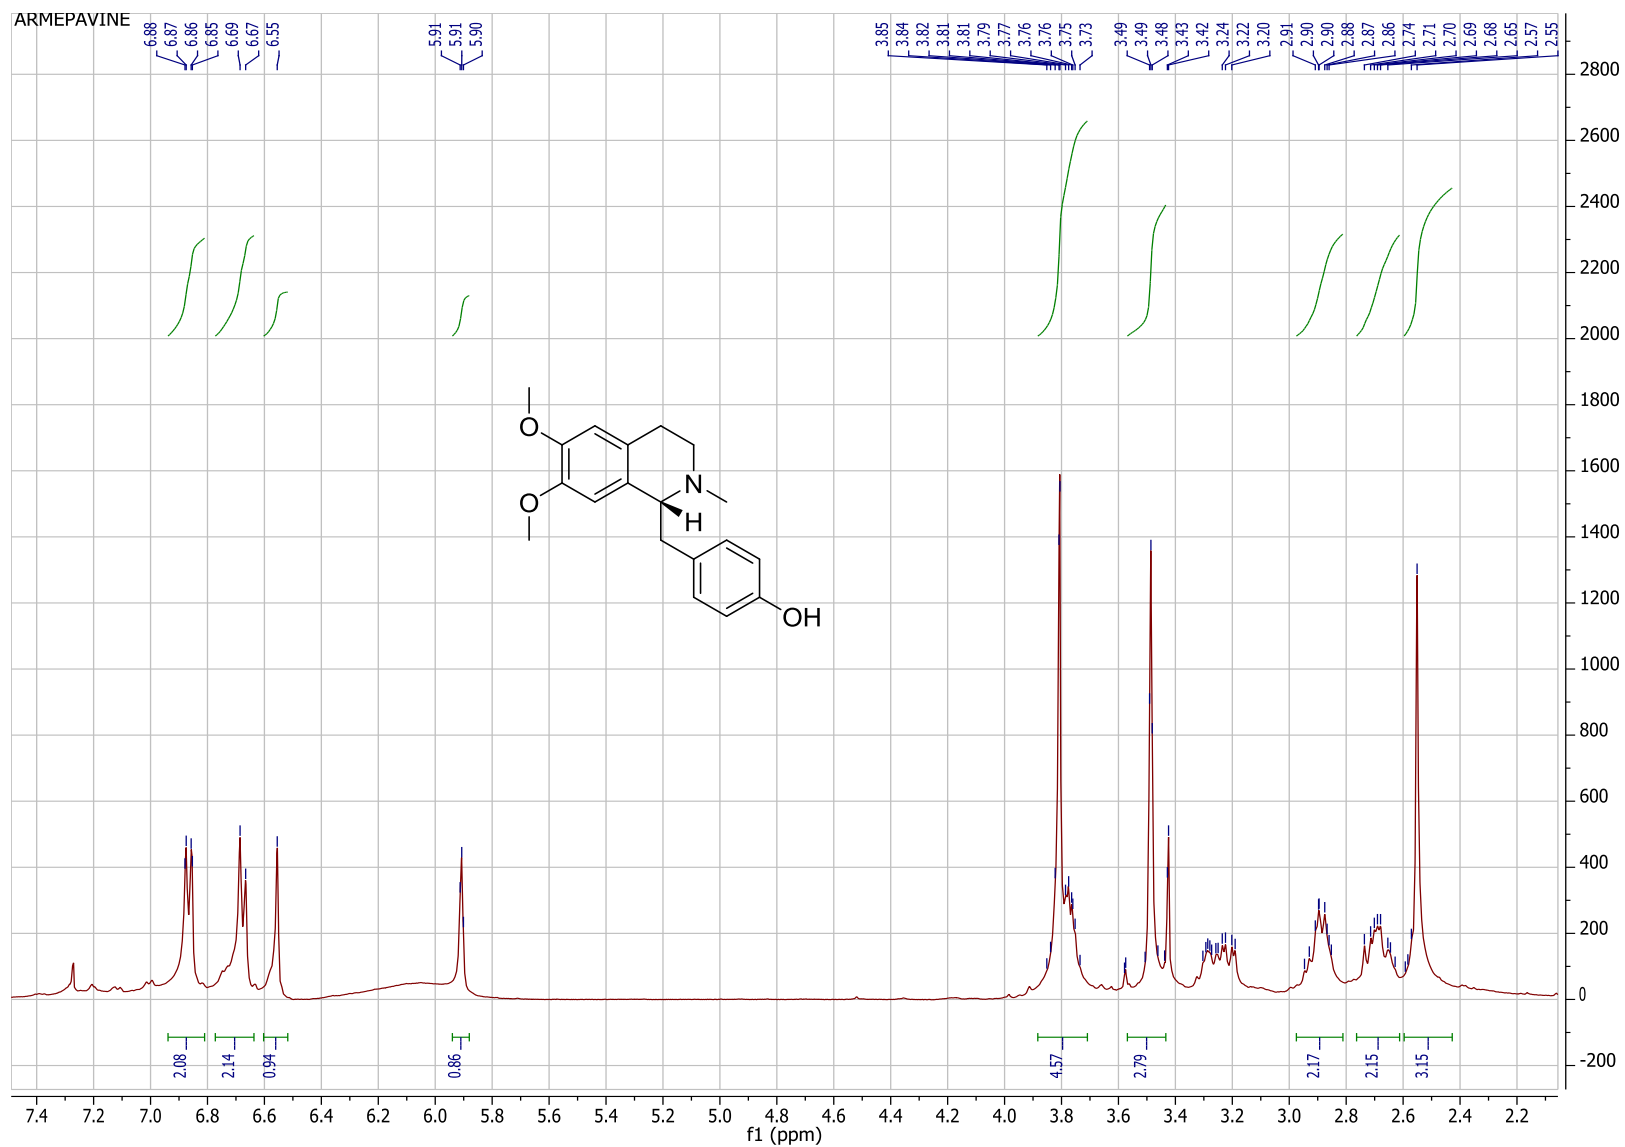

Figure 7S. <sup>1</sup>H NMR spectrum of armapavine (4).

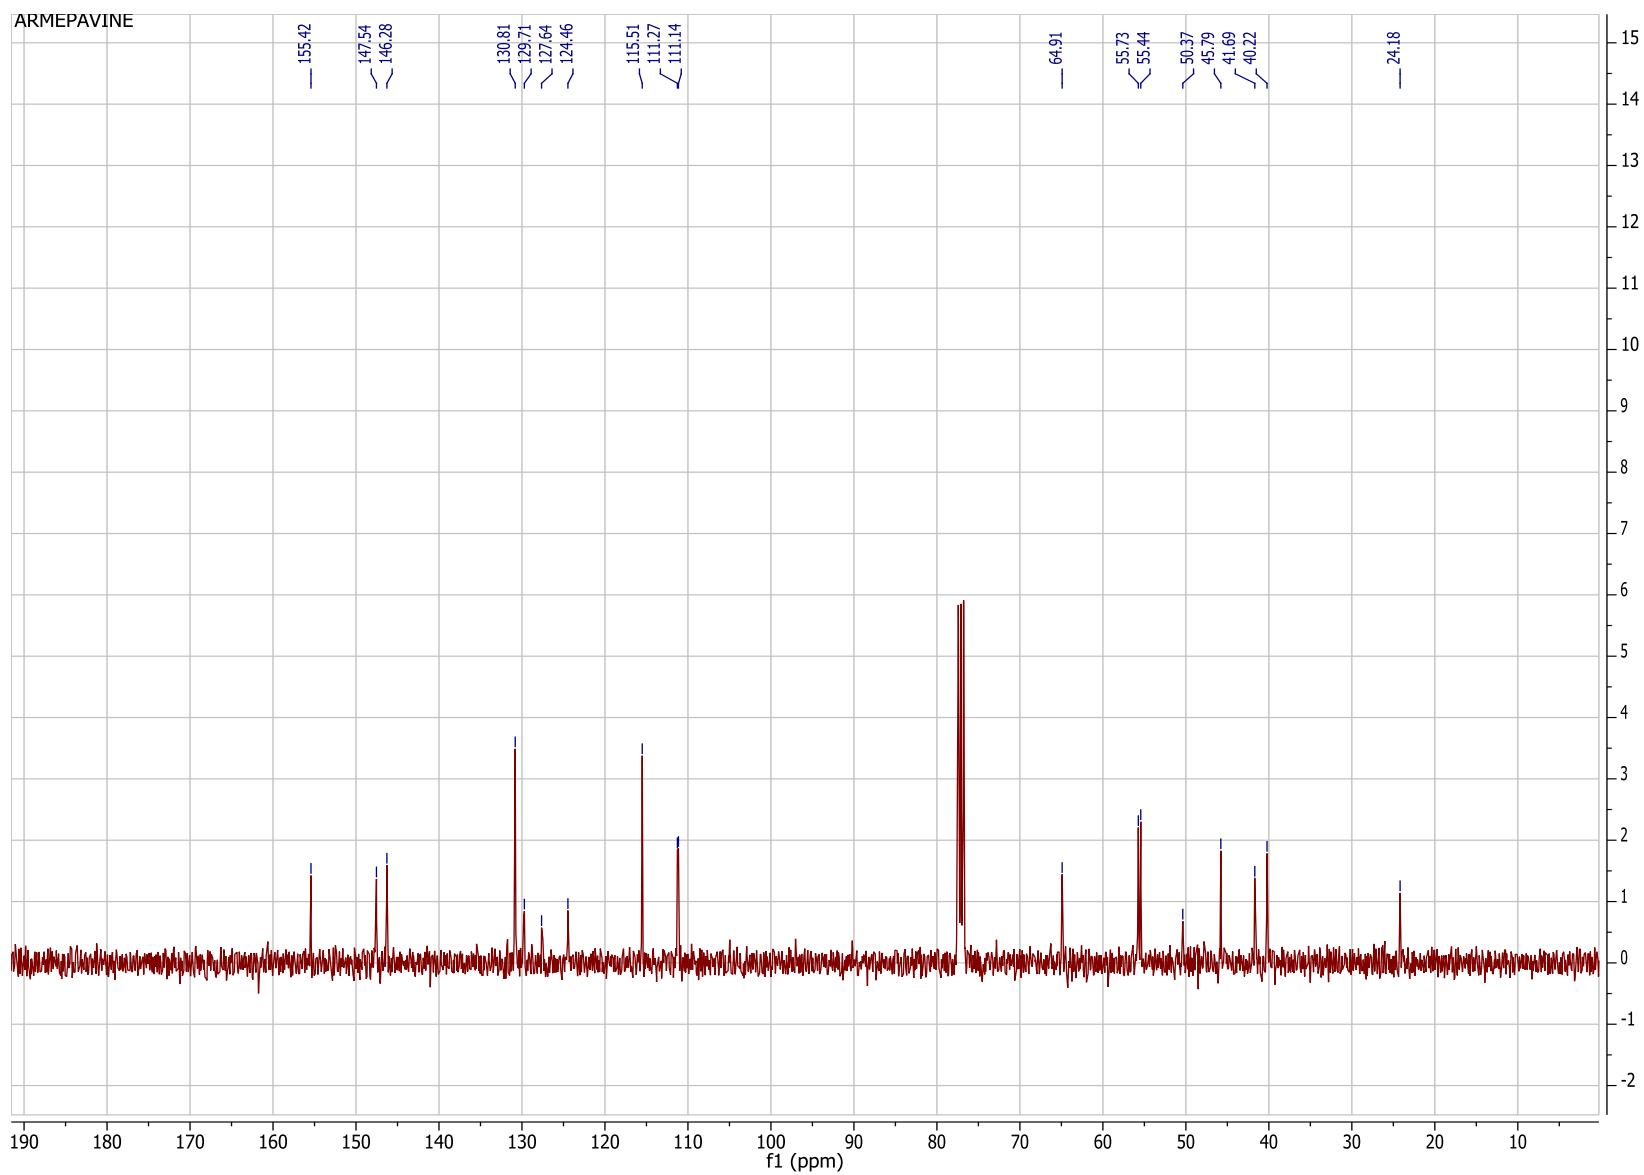

**Figure 8S.**  $^{13}\text{C}$  NMR spectrum of arnepavine (**4**).

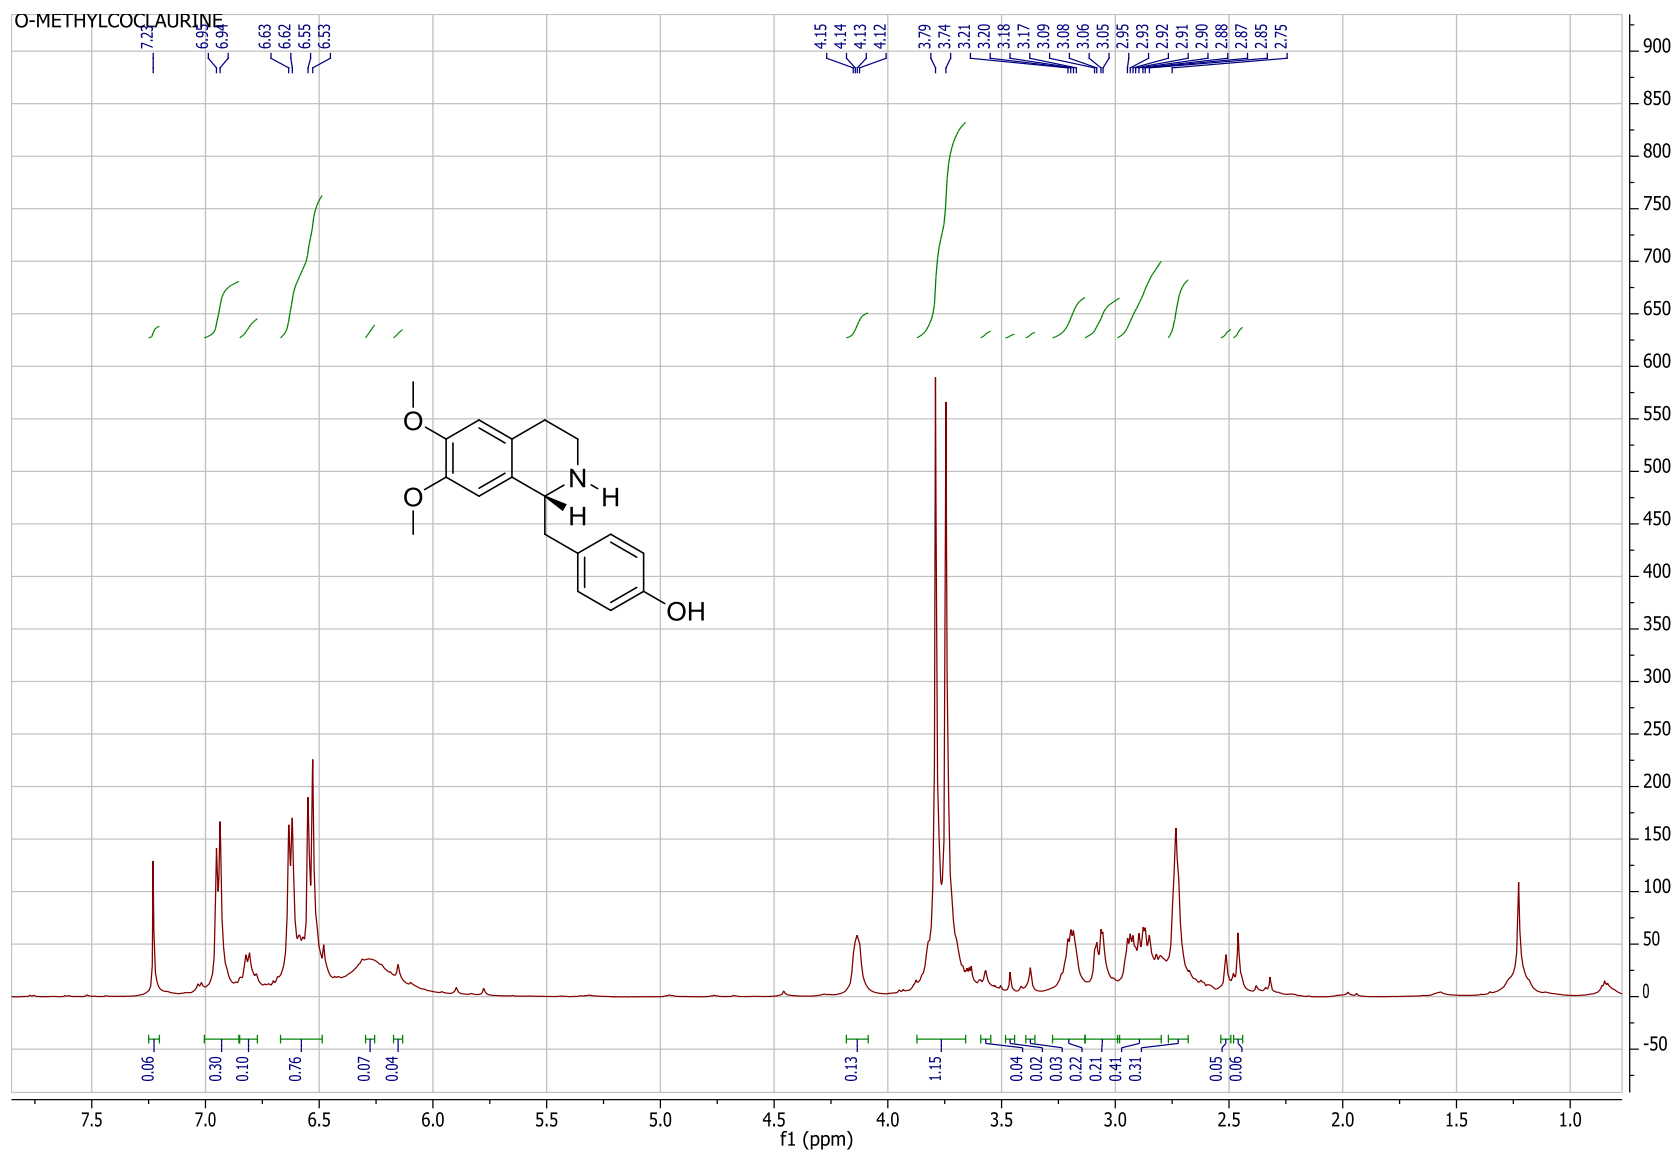

Figure 9S. <sup>1</sup>H NMR spectrum of *O*-methylcoclaurine (5).

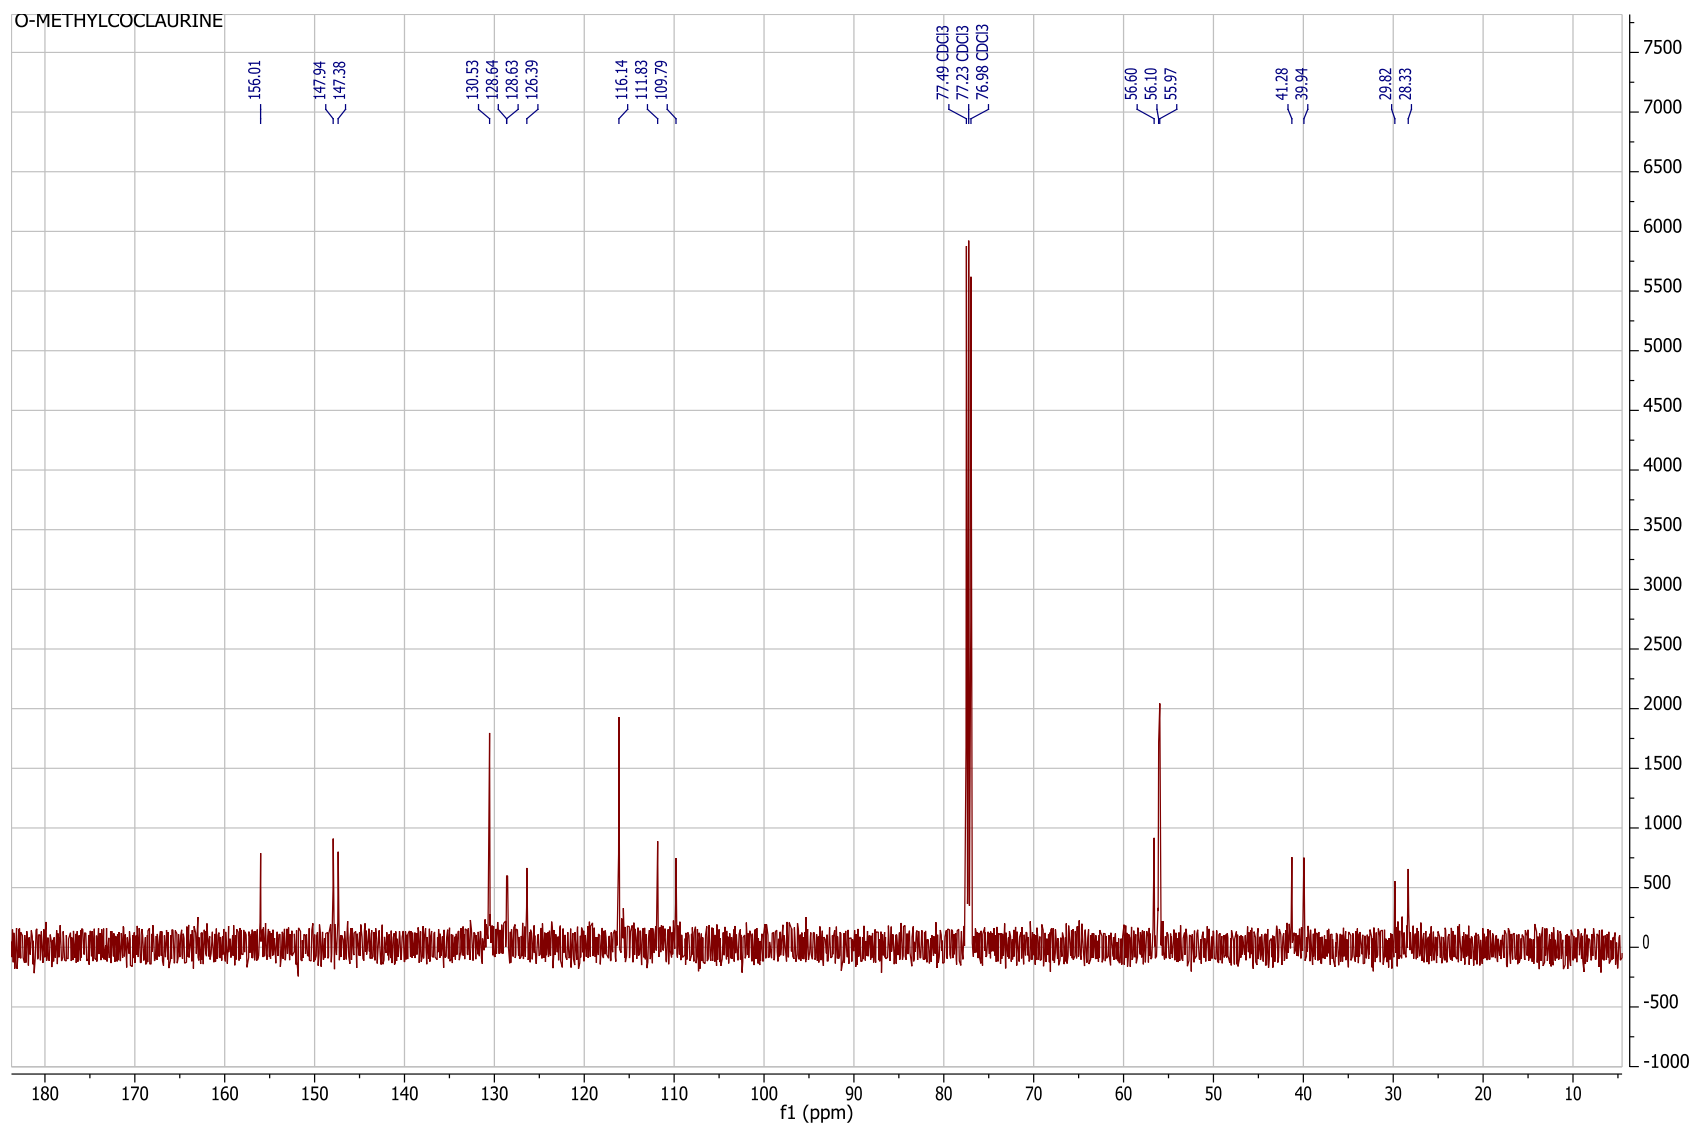

**Figure 10S.**  $^{13}\text{C}$  NMR spectrum of *O*-methylcoclaurine (**5**).

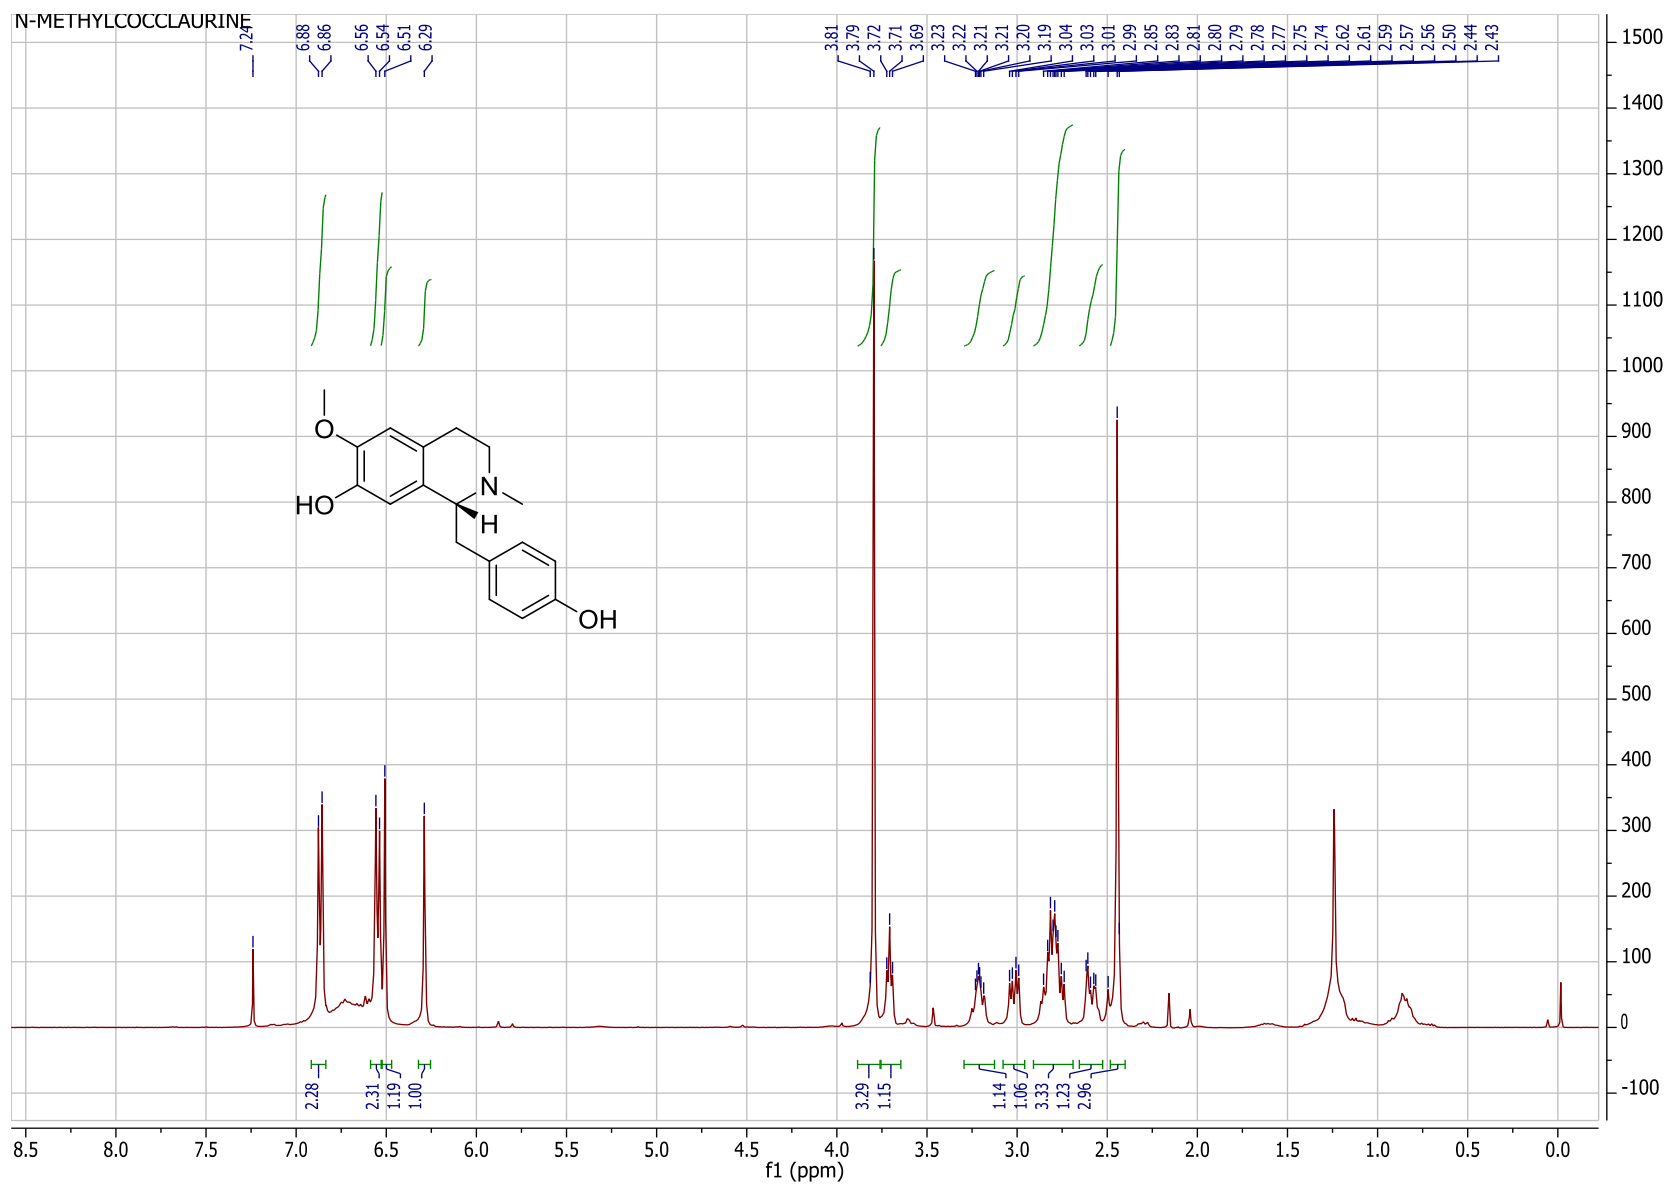

Figure 11S. <sup>1</sup>H NMR spectrum of *N*-methylcocclaurine (6).

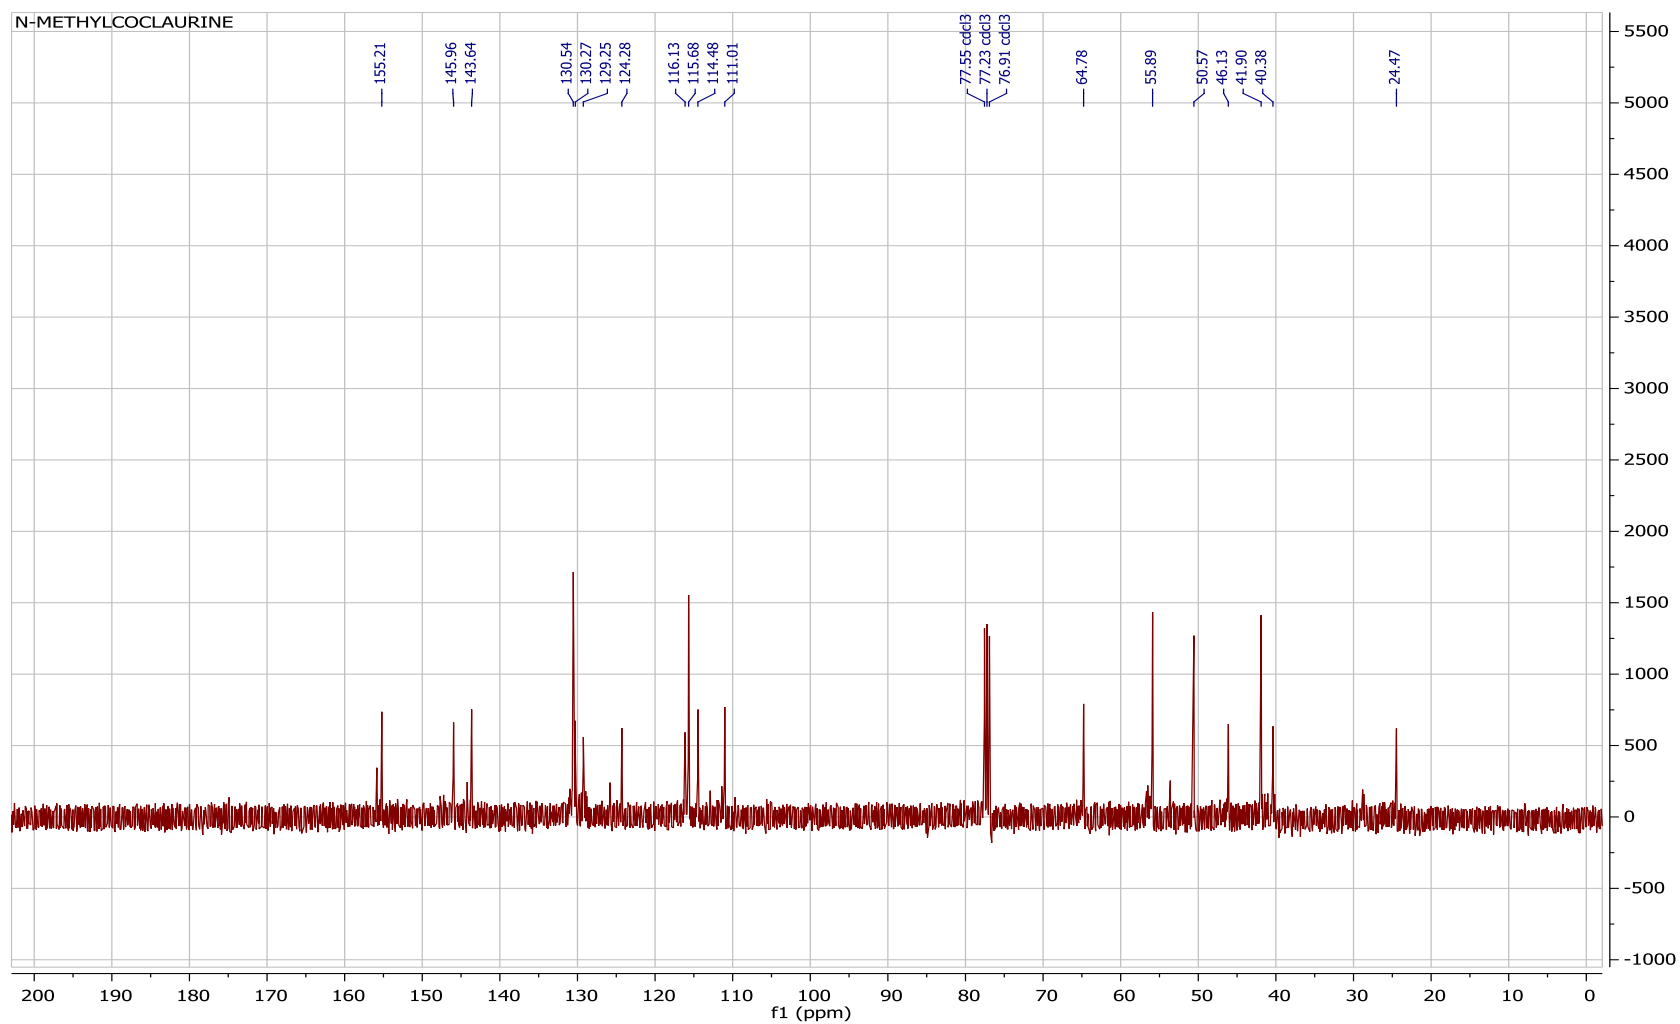

Figure 12S.  $^{13}\text{C}$  NMR spectrum of *N*-methylcoclaurine (6).

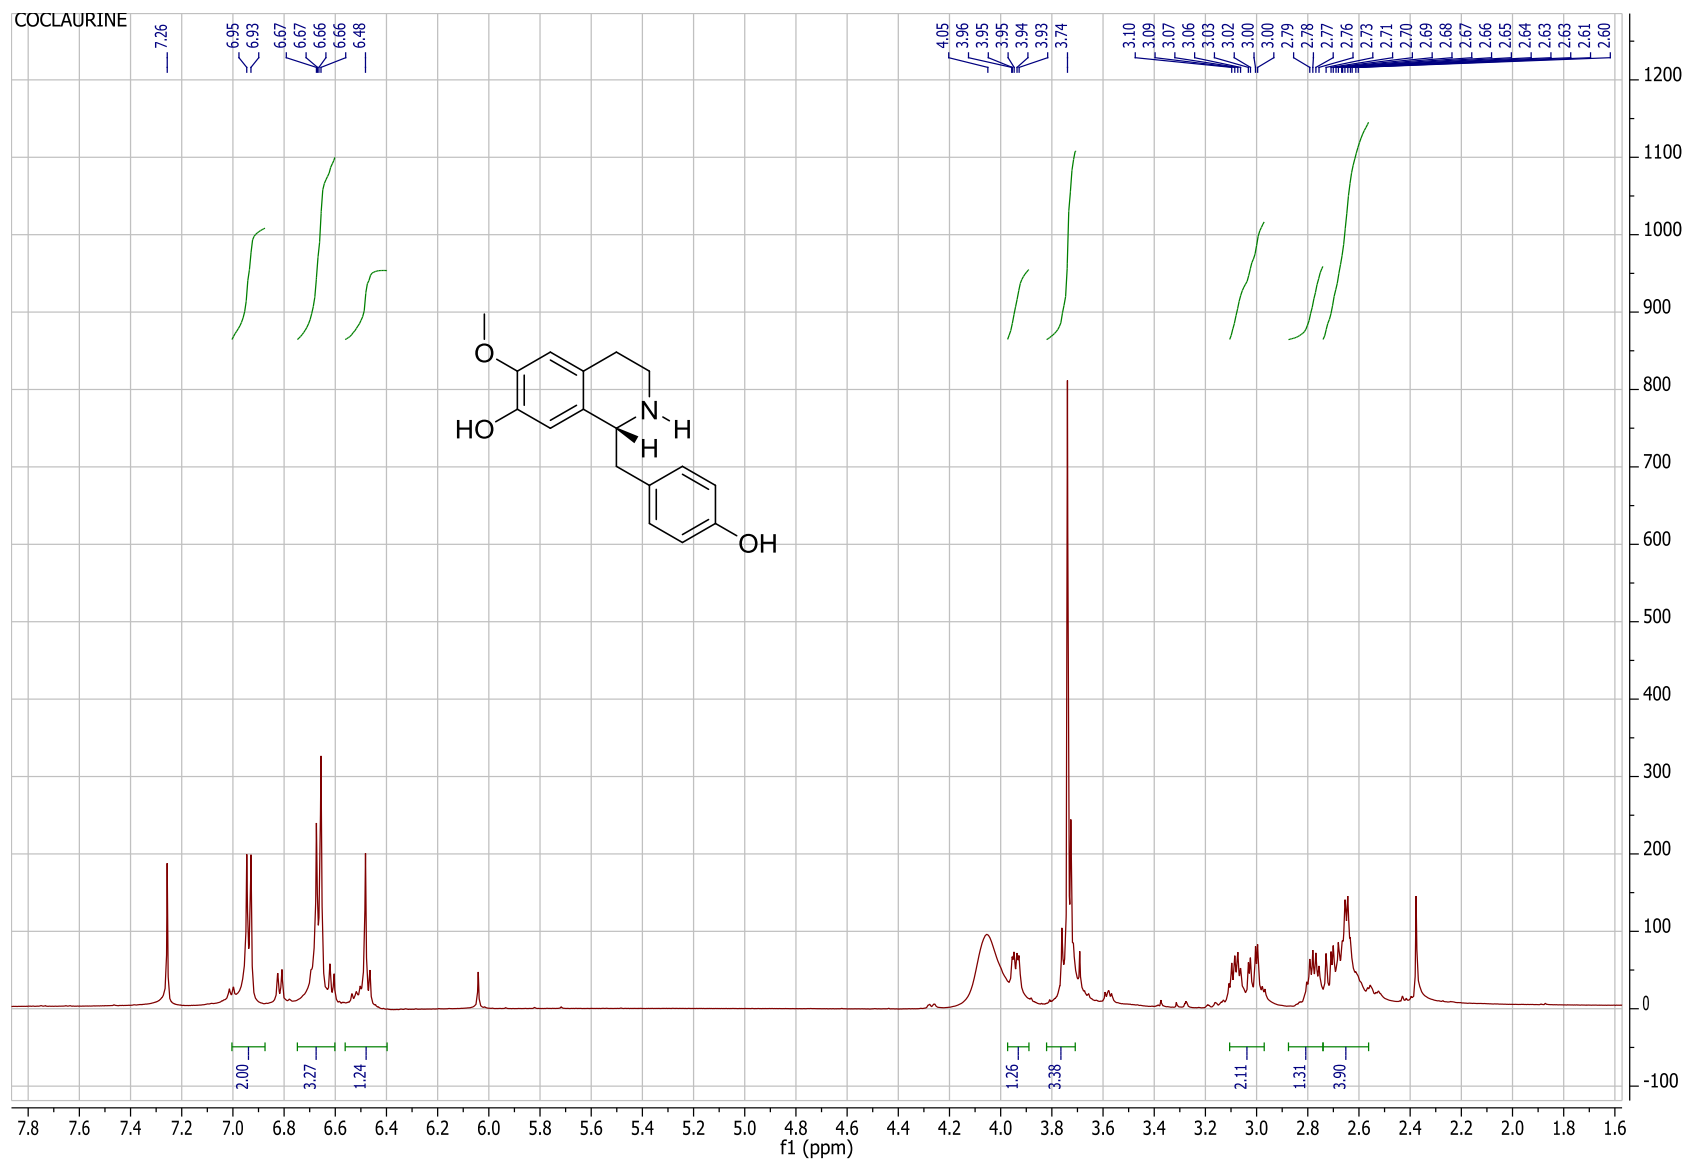

Figure 13S. <sup>1</sup>H NMR spectrum of coclaurine (7).



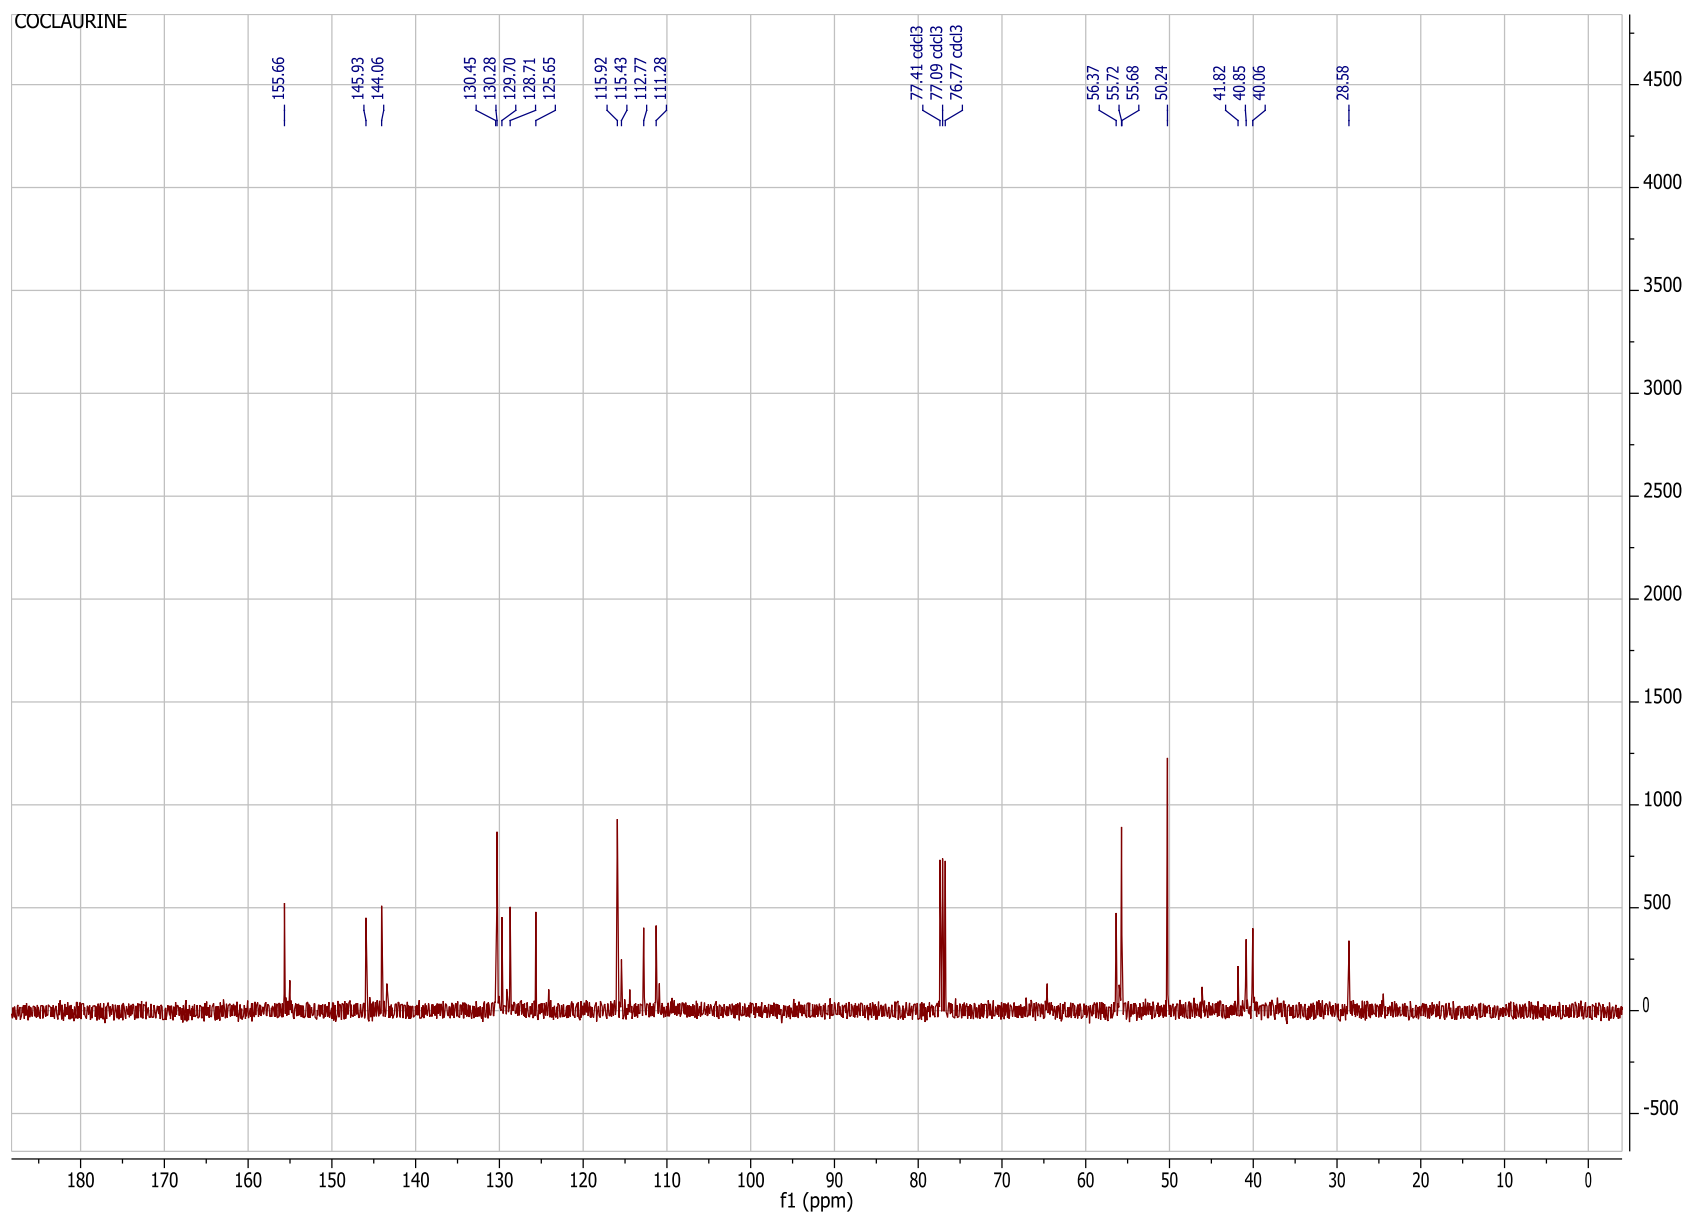

**Figure 14S.**  $^{13}\text{C}$  NMR spectrum of coclaurine (**7**).

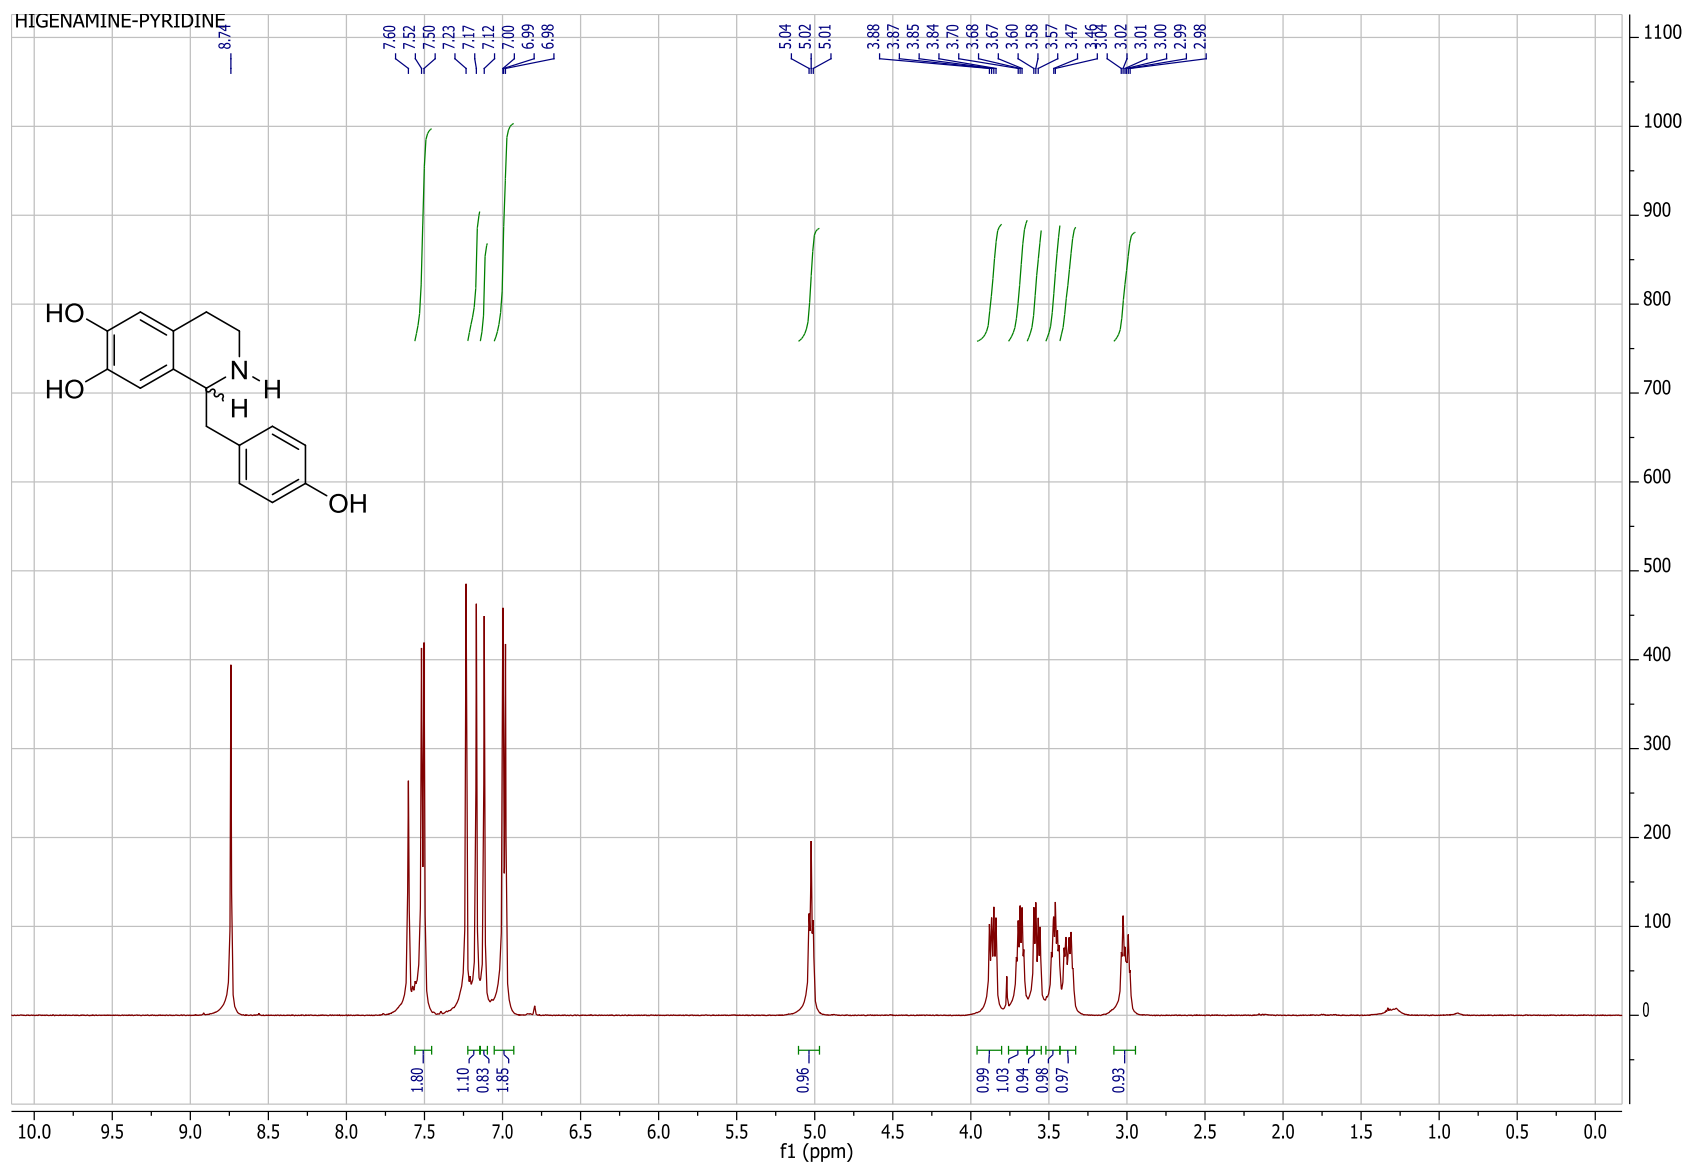

Figure 15S.  $^1\text{H}$  NMR spectrum of ( $\pm$ )-higenamine (**11**).

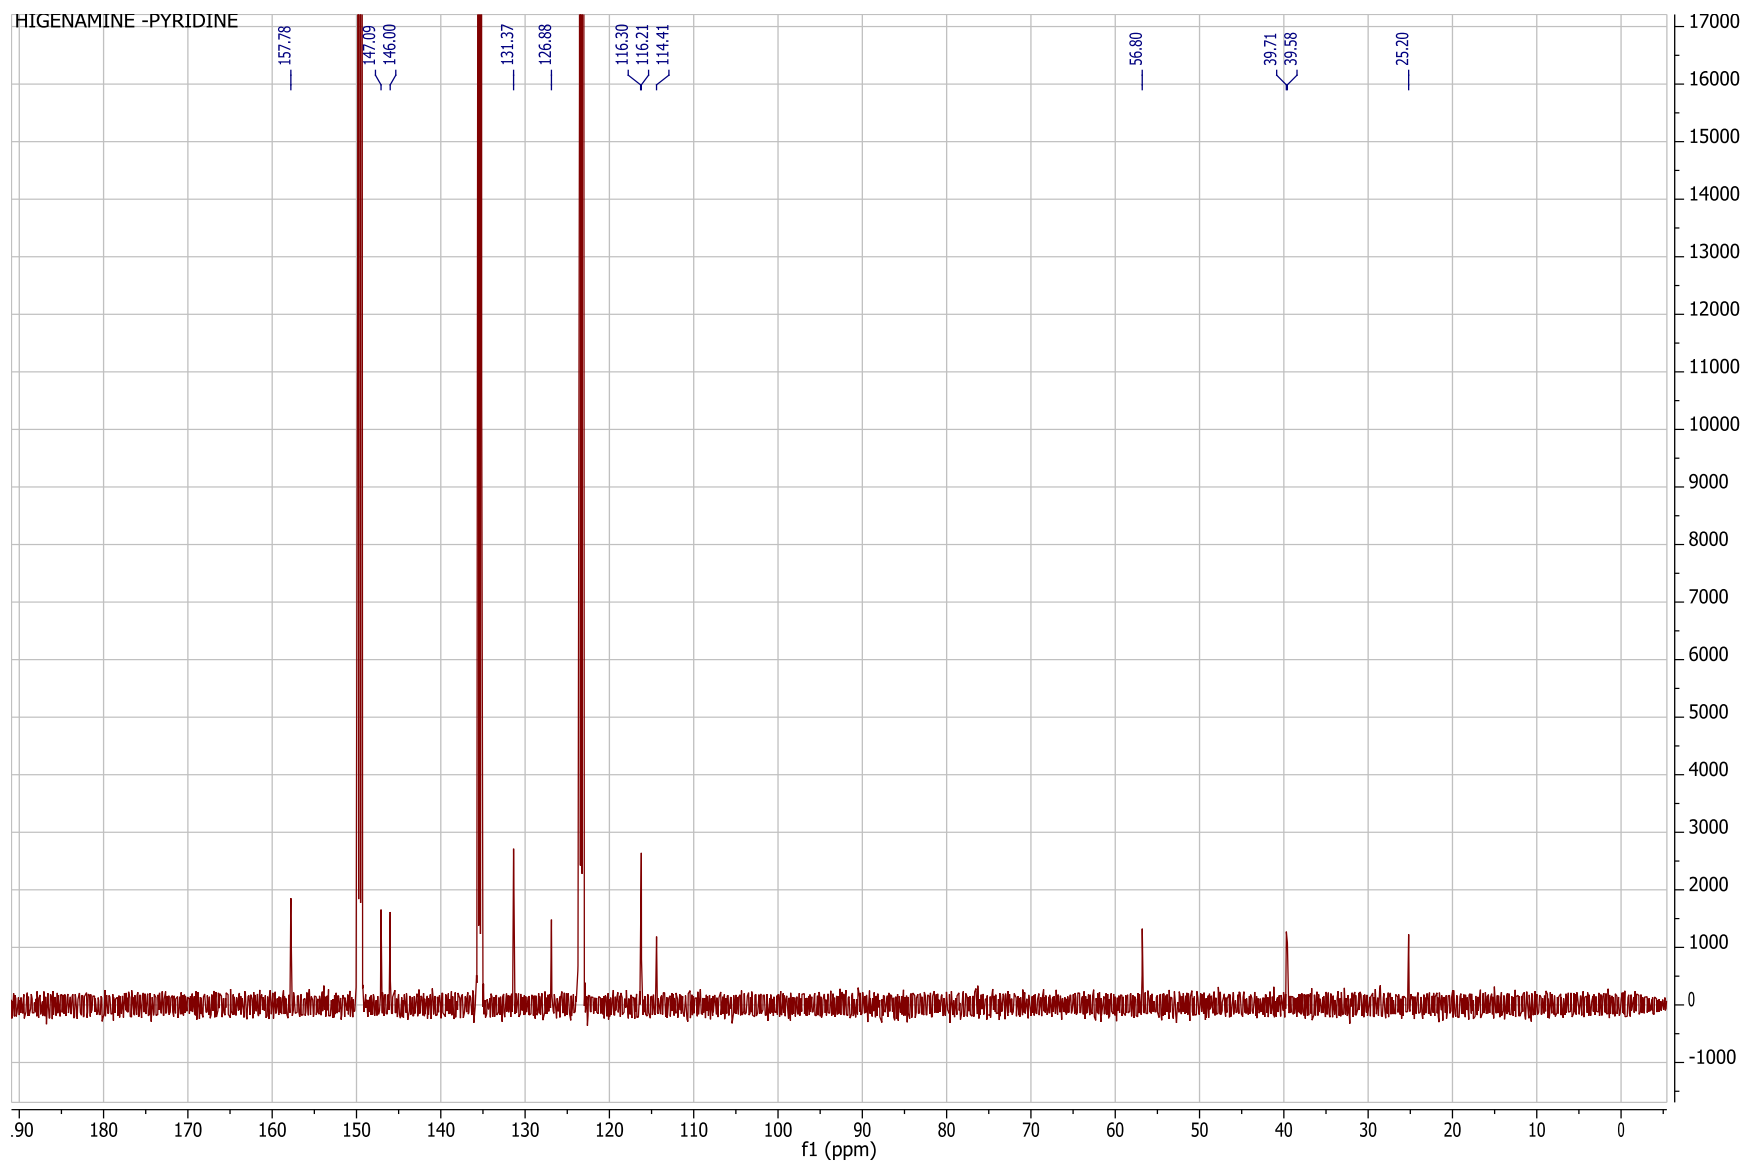

**Figure 16S.**  $^{13}\text{C}$  NMR spectrum of ( $\pm$ )-higenamine (**11**).

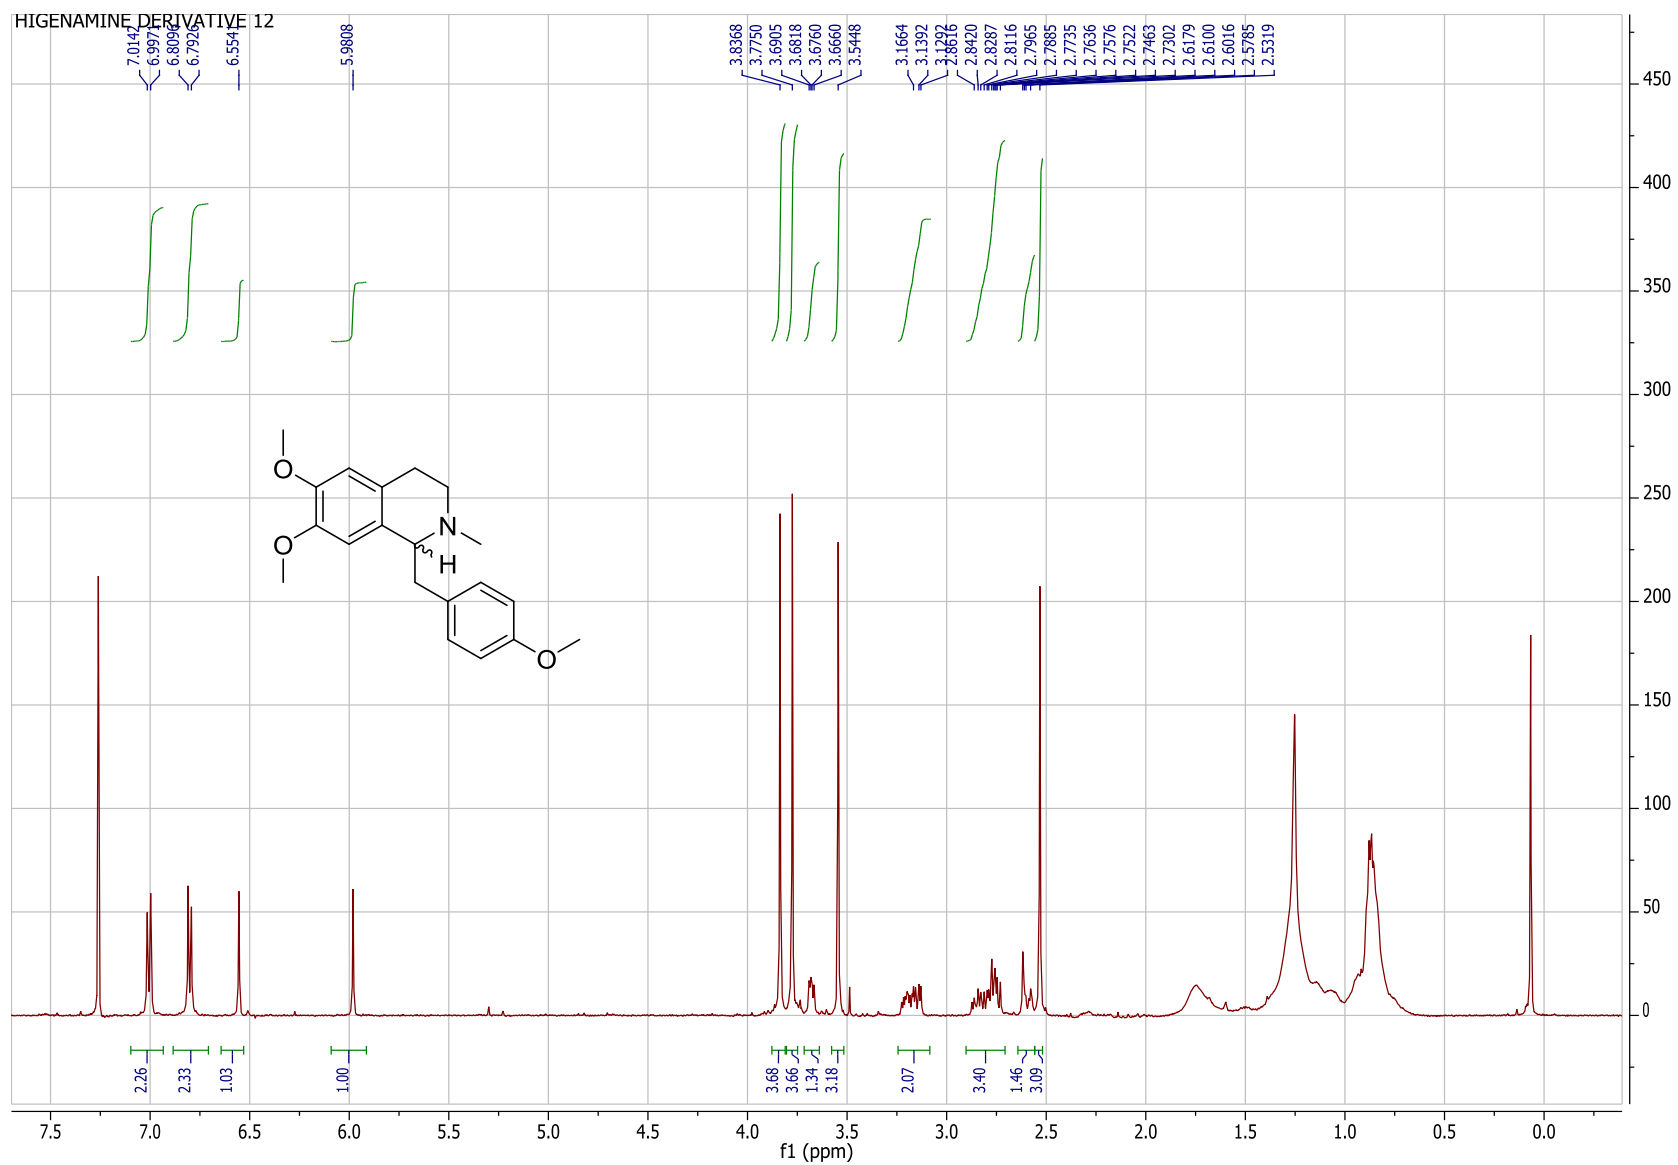

**Figure 17S.**  $^1\text{H}$  NMR spectrum of higenamine derivative **12** (4'-O-methylarmepavine).

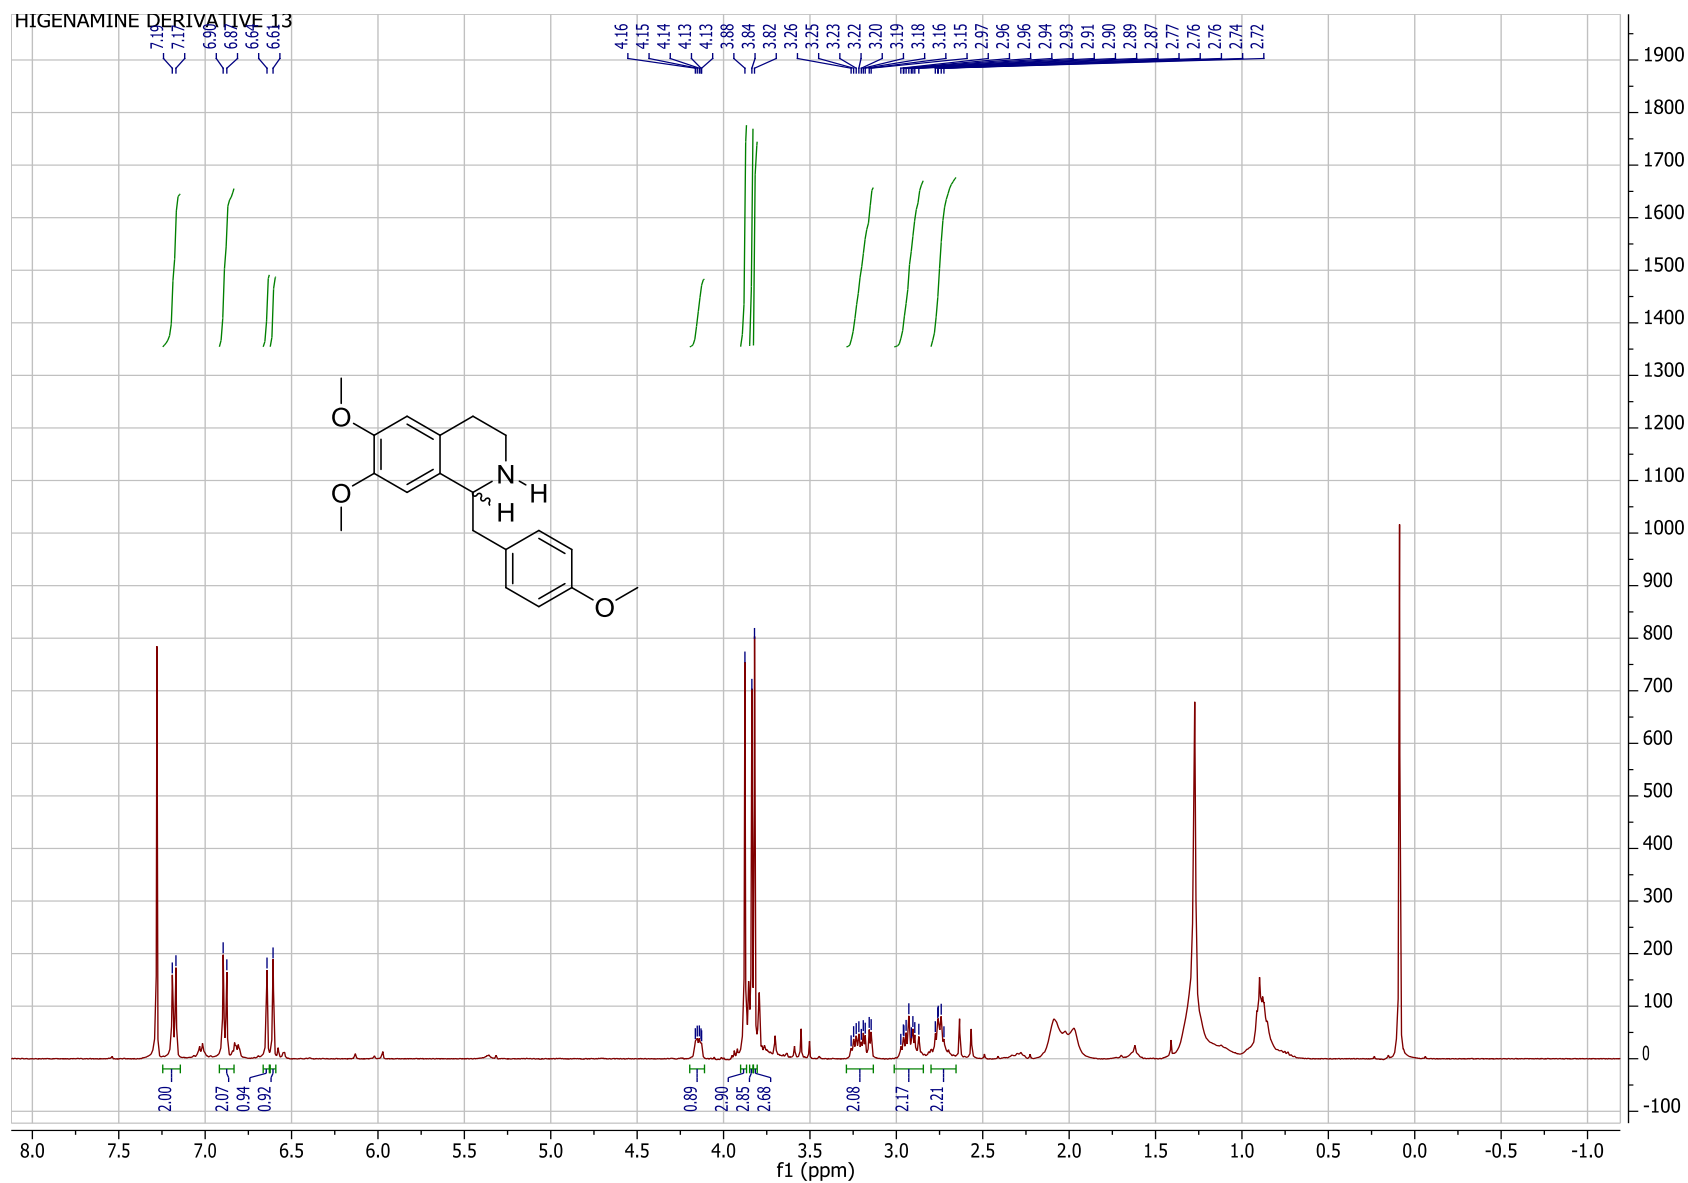

**Figure 18S.**  $^1\text{H}$  NMR spectrum of higenamine derivative **13** (4',7-di-*O*-methylarmepavine).

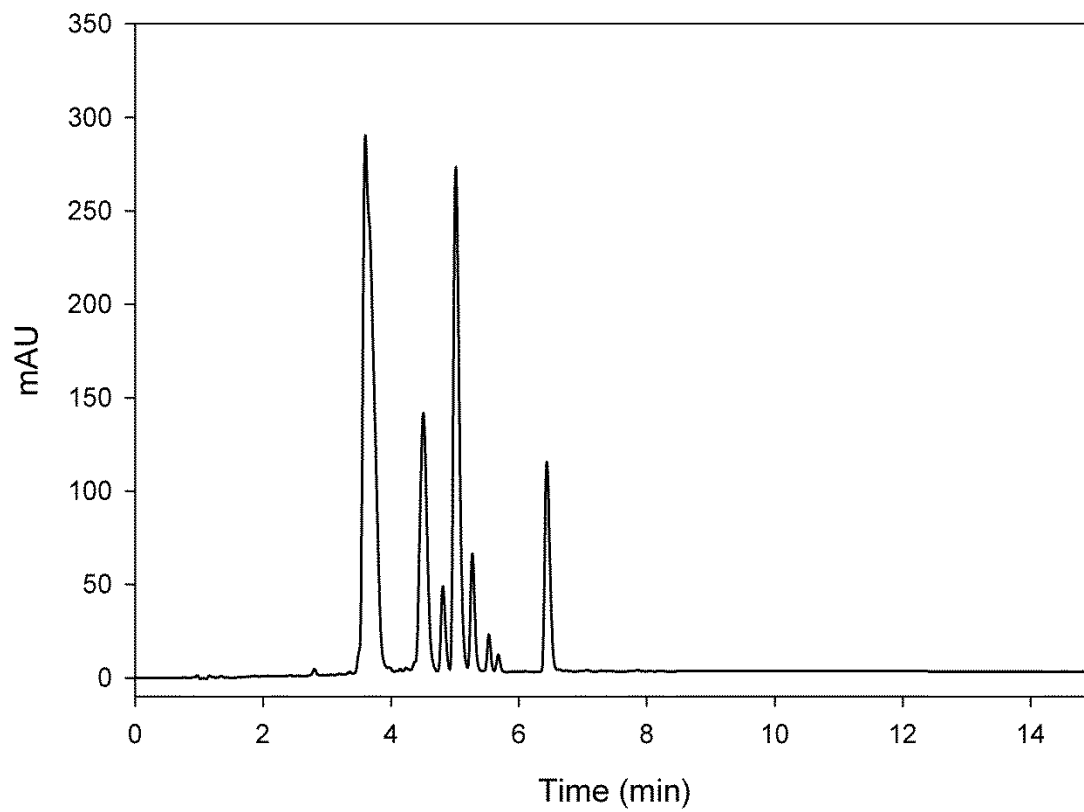

**Figure 19S.** UHPLC-UV (280 nm) chromatogram of basic partition of *N. nucifera* white flower.

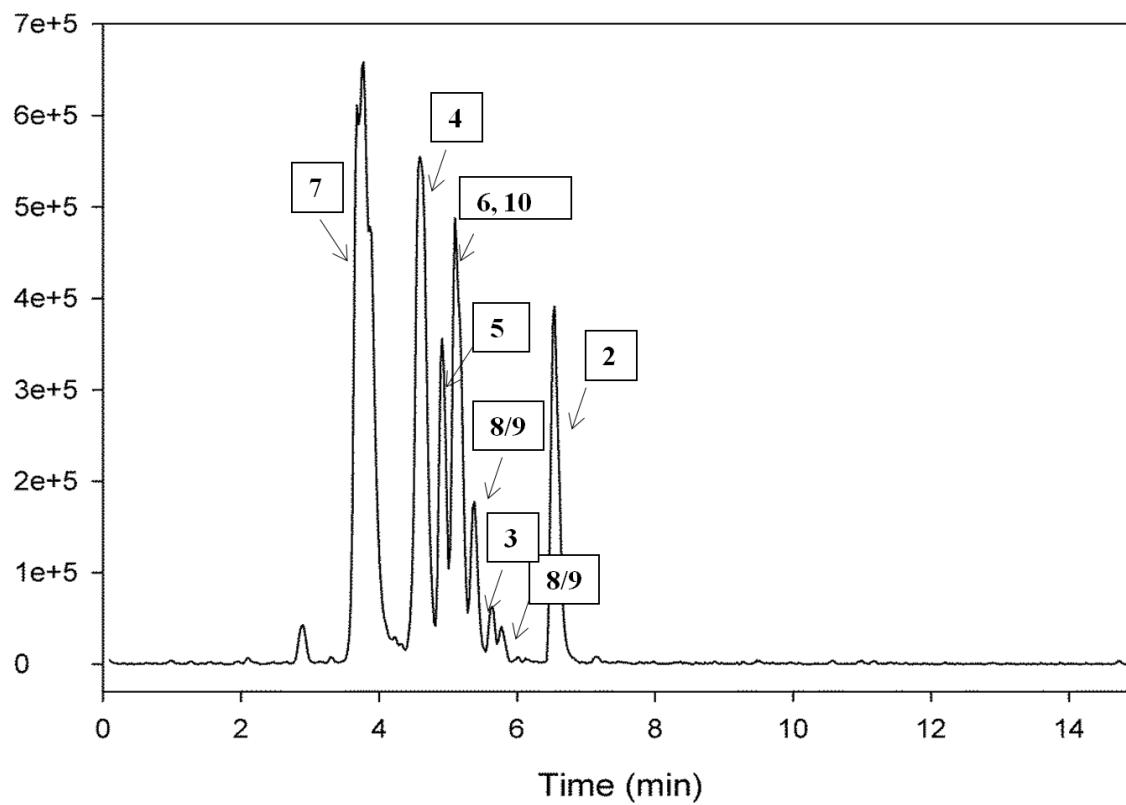

**Figure 20S.** UHPLC- ESI Positive chromatogram of basic partition of *N. nucifera* white flower.

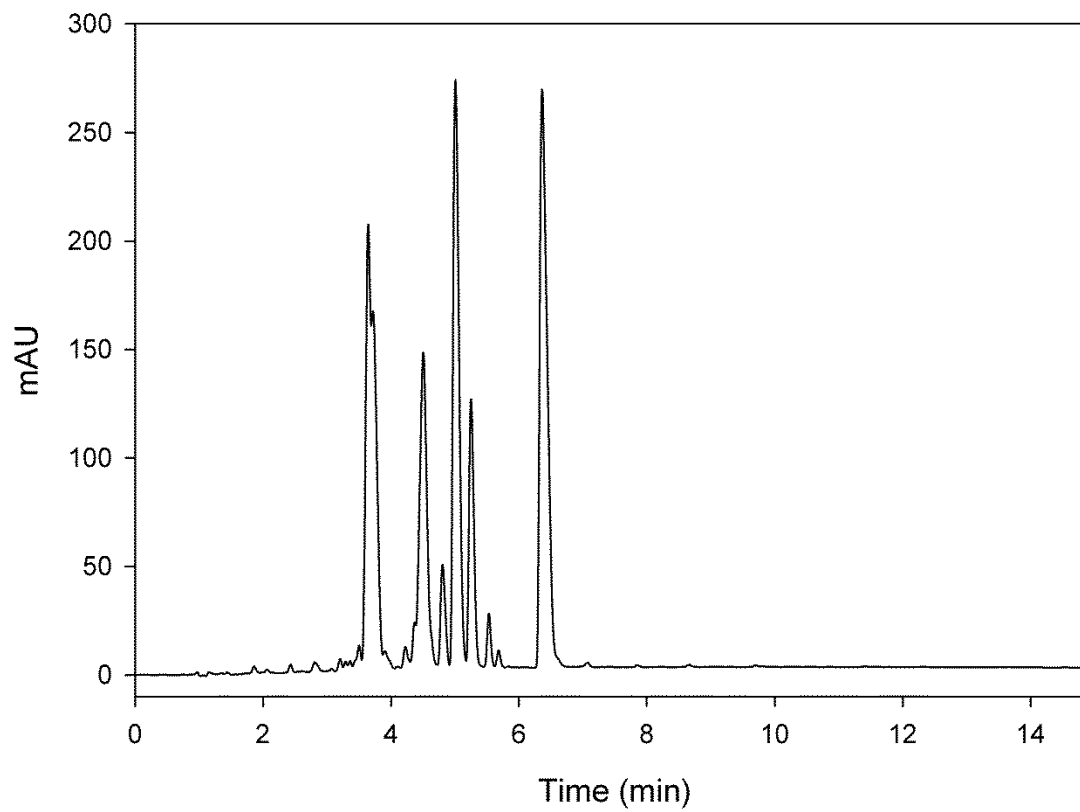

**Figure 21S.** UHPLC-UV (280 nm) chromatogram of basic partition of *N. nucifera* pink flower.



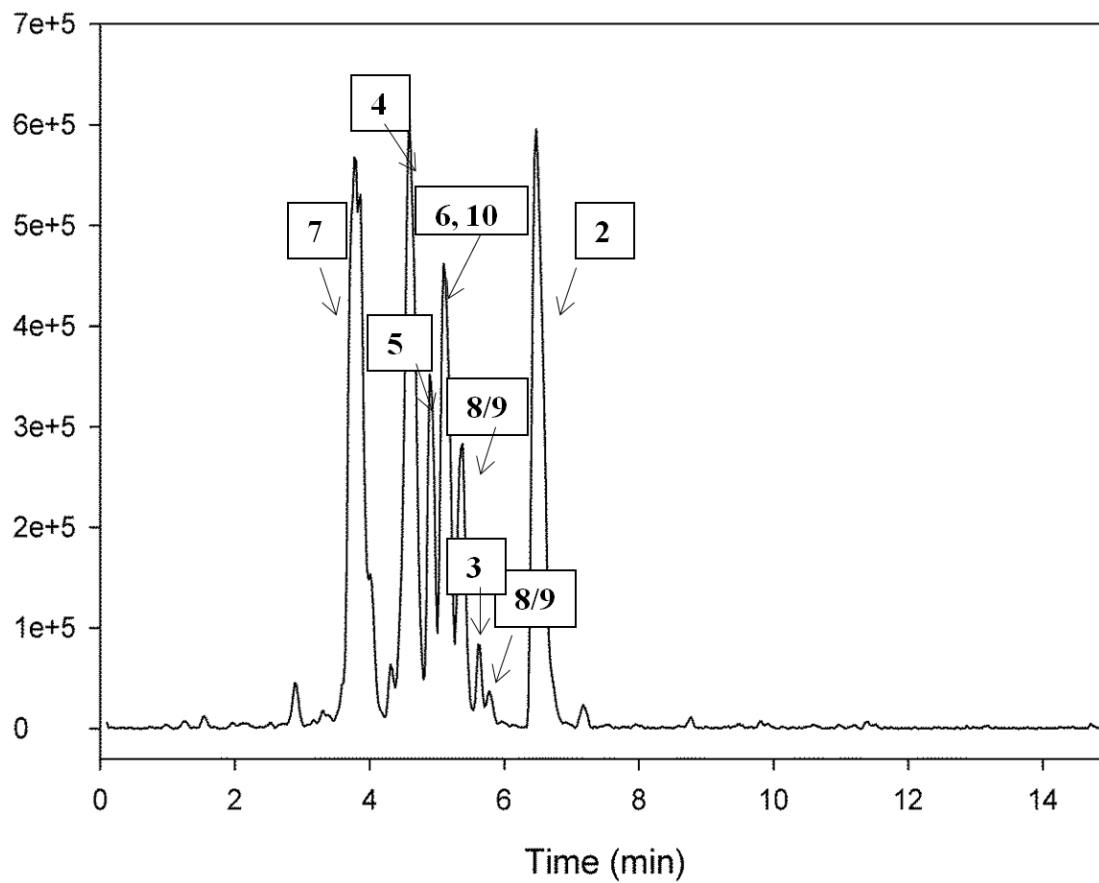

**Figure 22S.** UHPLC- ESI Positive chromatogram of basic partition of *N. nucifera* pink flower.

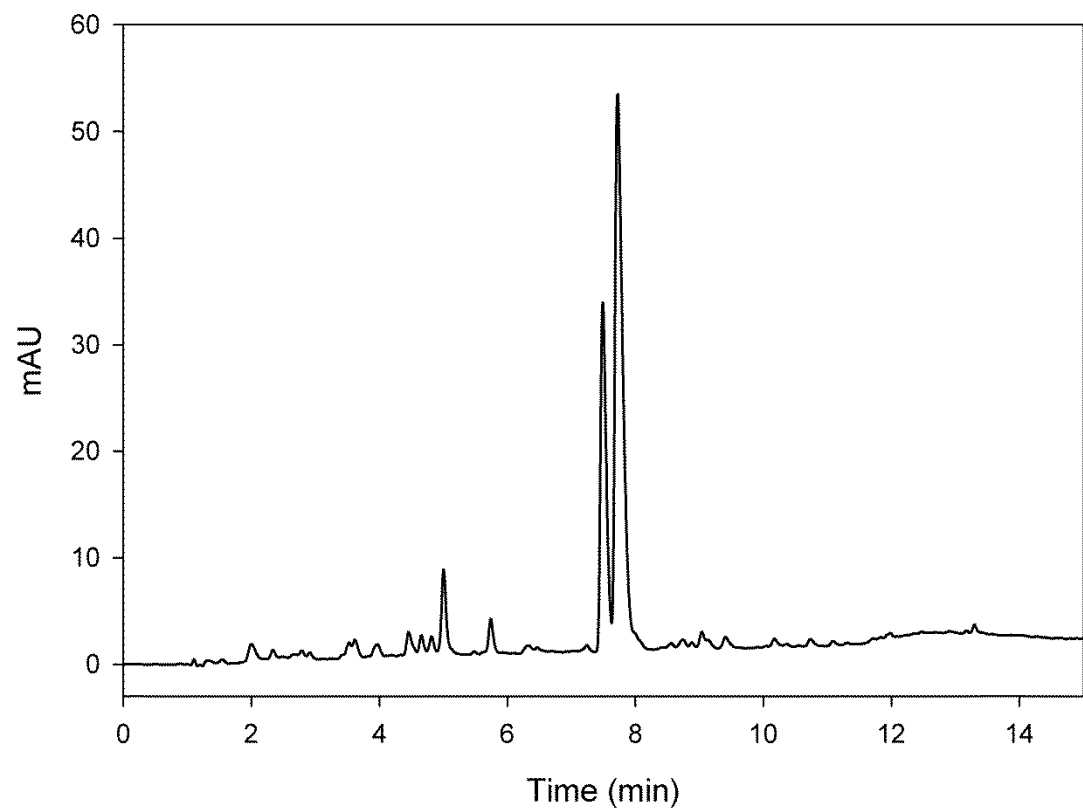

**Figure 23S.** UHPLC-UV (280 nm) chromatogram of acidic partition of *N. nucifera* white flower.

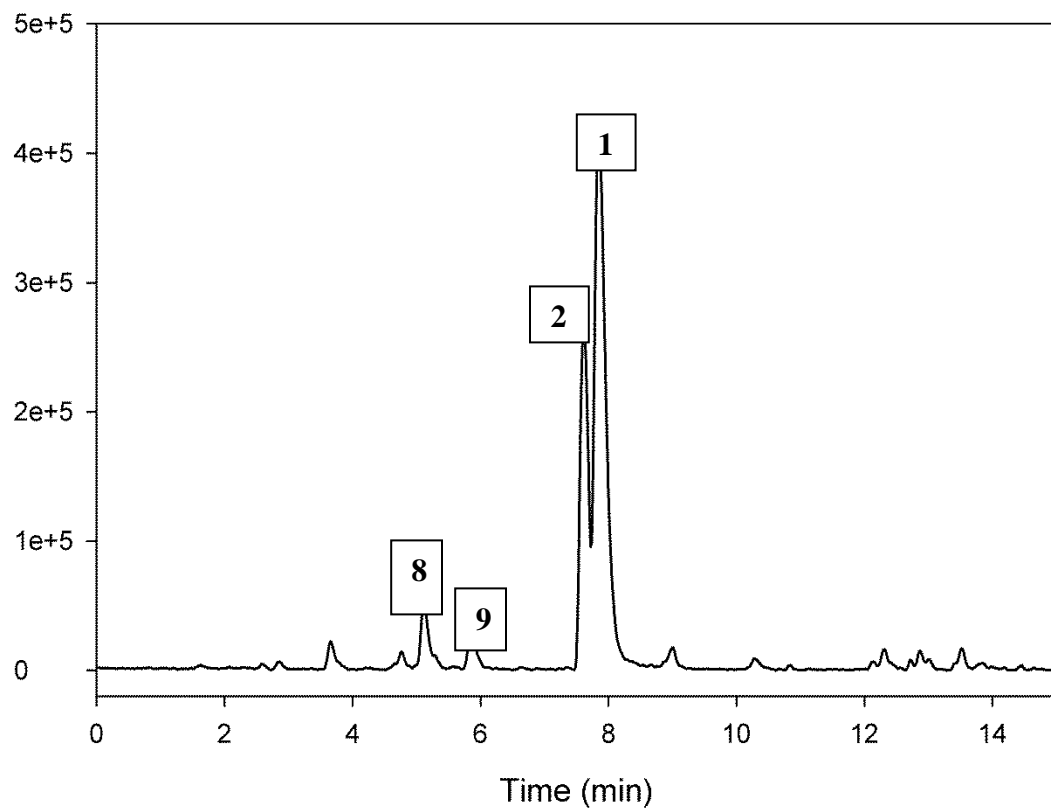

**Figure 24S.** UHPLC- ESI Positive chromatogram of acidic partition of *N. nucifera* white flower.

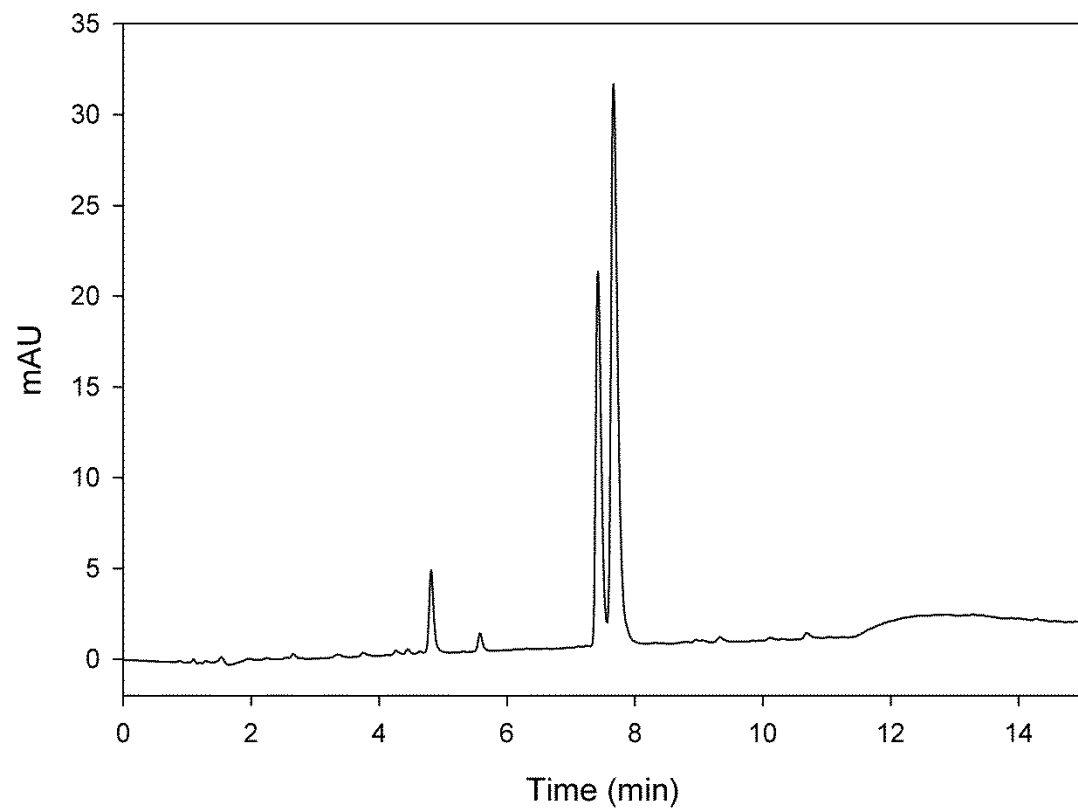

**Figure 25S.** UHPLC-UV (280 nm) chromatogram of acidic partition of *N. nucifera* pink flower.

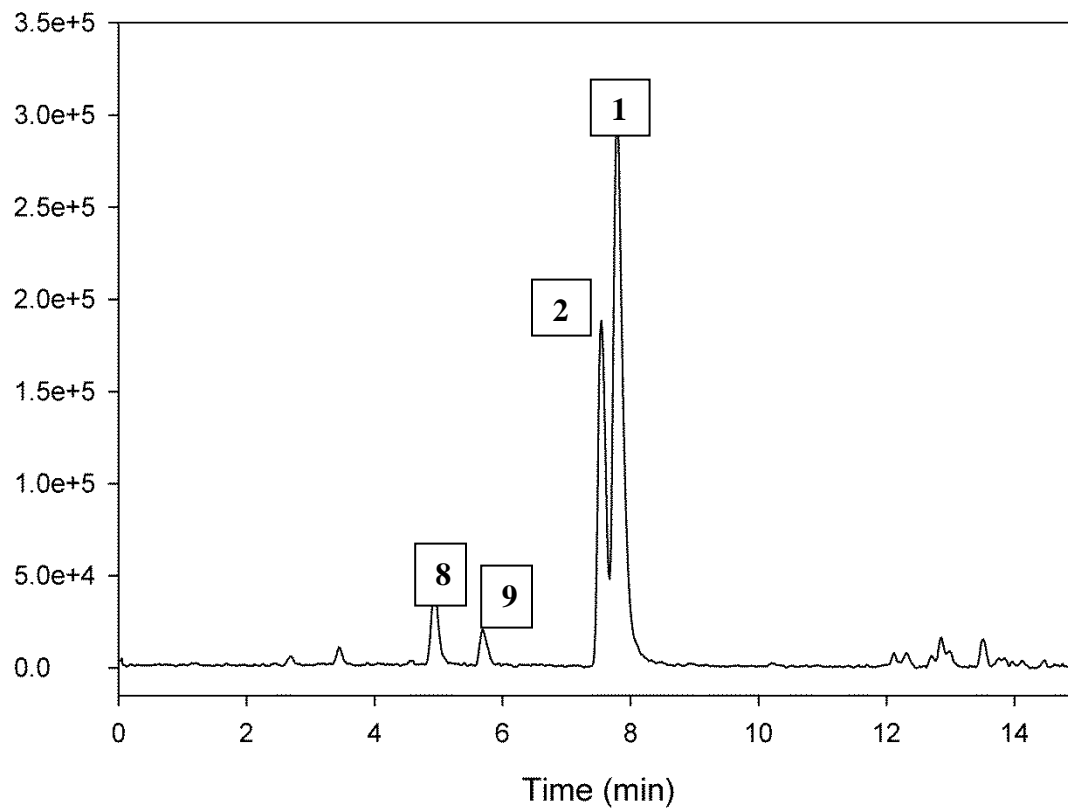

**Figure 26S.** UHPLC- ESI Positive chromatogram of acidic partition of *N. nucifera* pink flower.

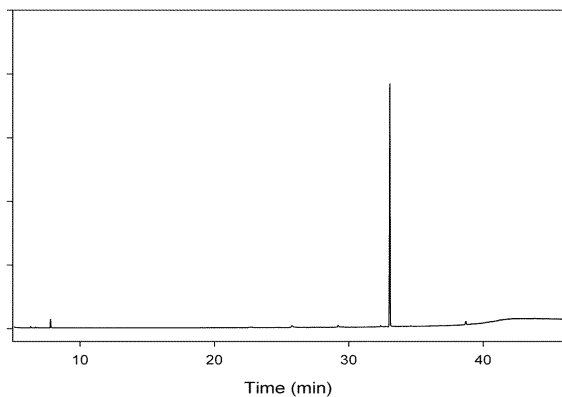

**Figure 27S.** GC/MS analysis of palmitic acid Me ester (Std)

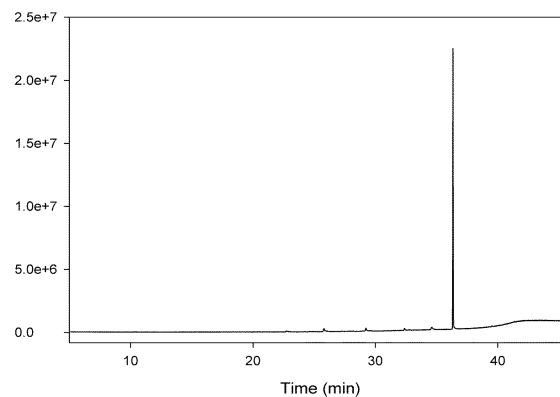

**Figure 28S.** GC/MS analysis of linoleic acid Me ester (Std)

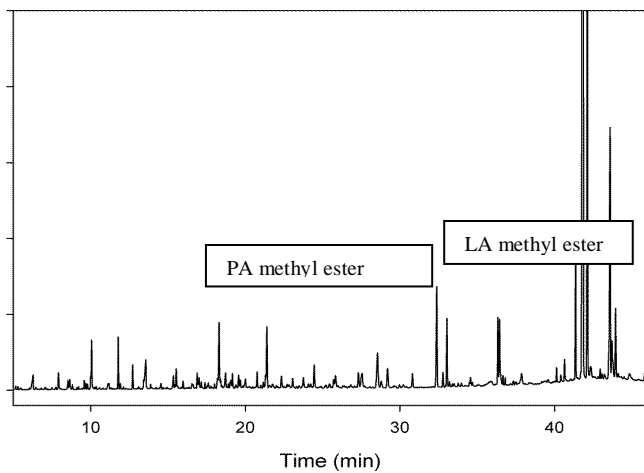

**Figure 29S.** GC/MS analysis of acidic patition (white flower)

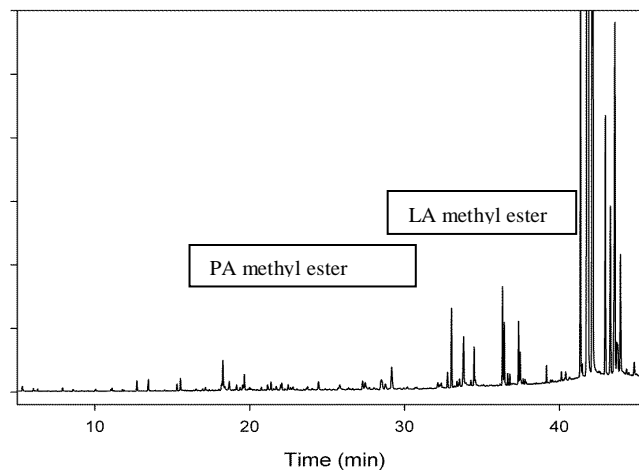

**Figure 30S.** GC/MS analysis of acidic patition (pink flower)

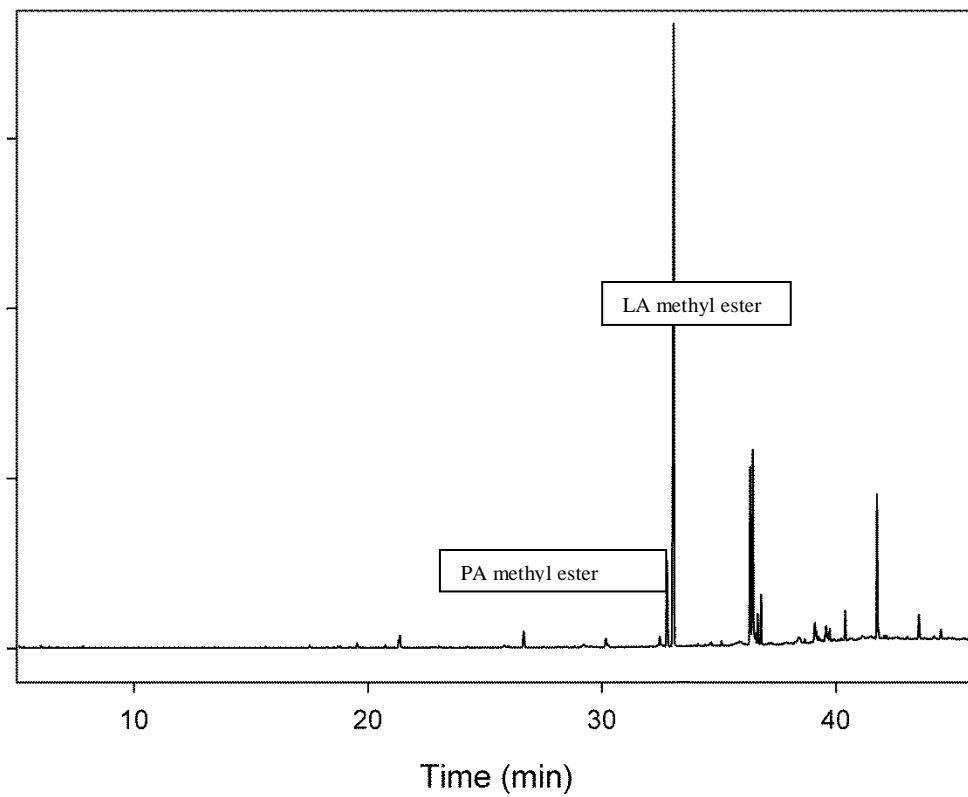

**Figure 31S.** GC/MS analysis of fraction G.

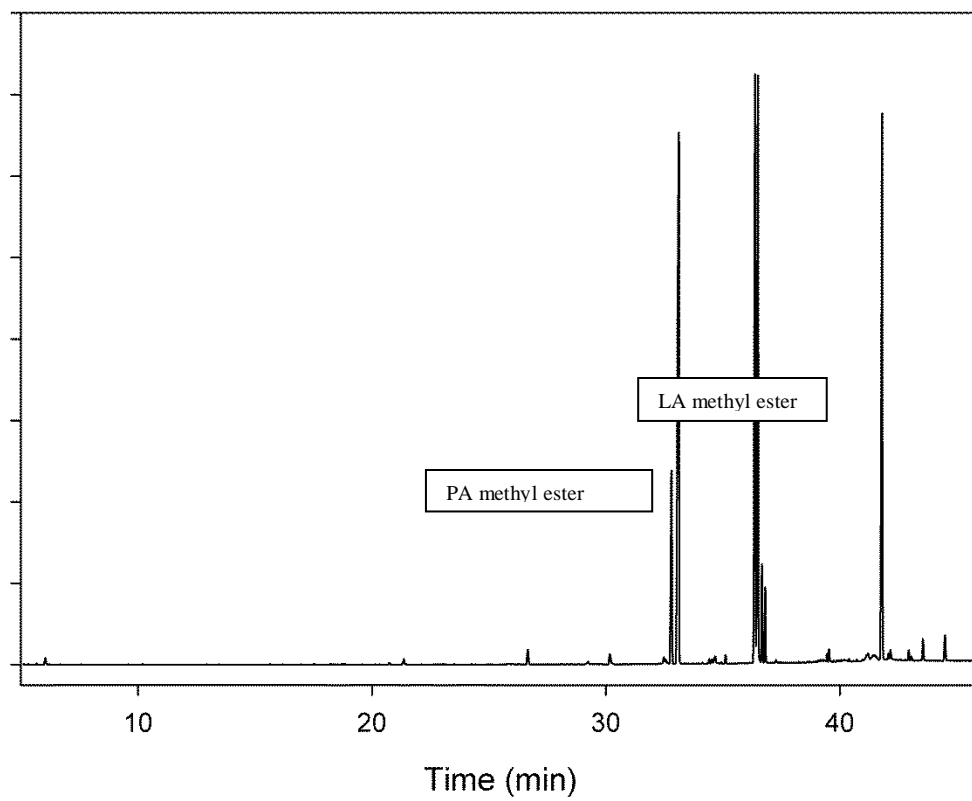

**Figure 32S.** GC/MS analysis of fraction H.



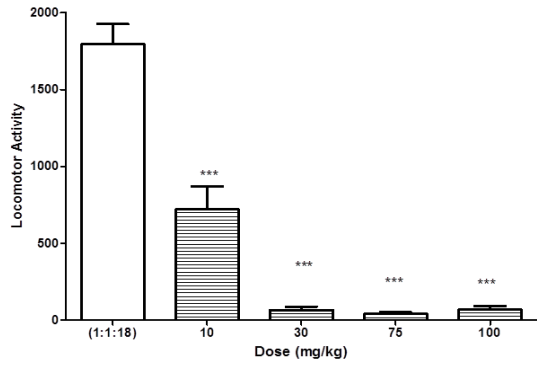

(a). Locomotor activity

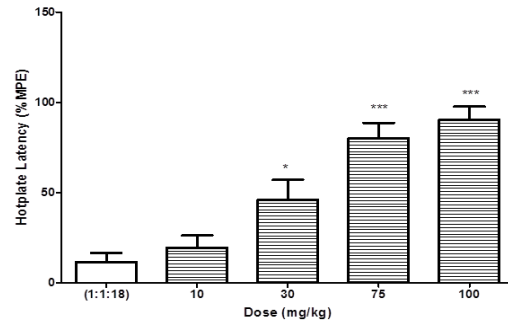

(b). Hotplate latency

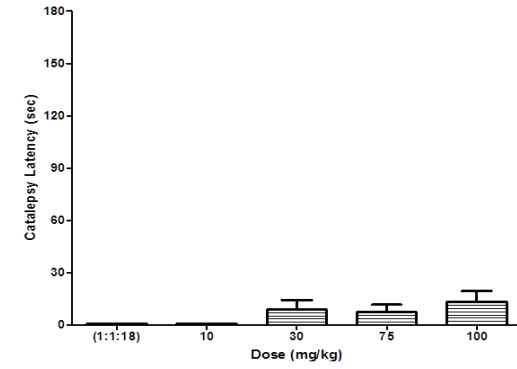

(c). Catalepsy latency

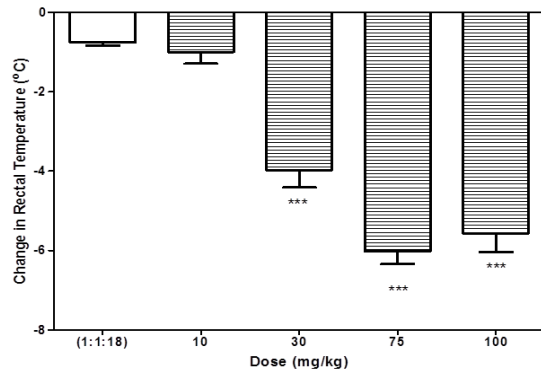

(d). Change in rectal temperature

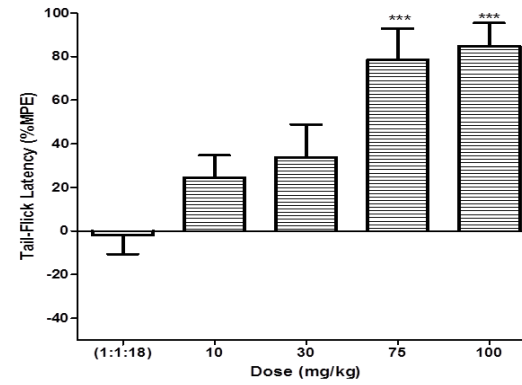

(a). Tail-flick latency

**Figure 33S.** *In vivo* mouse tetrad assay of acidic partition of *N. nucifera*.

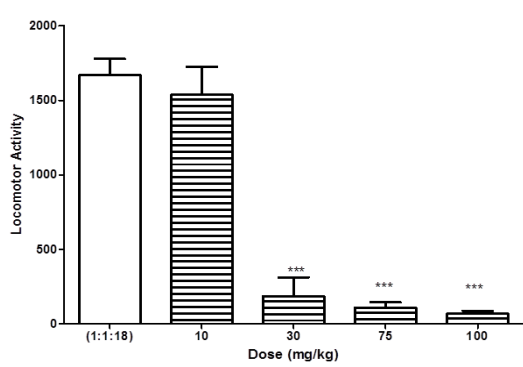

(a). Locomotor activity

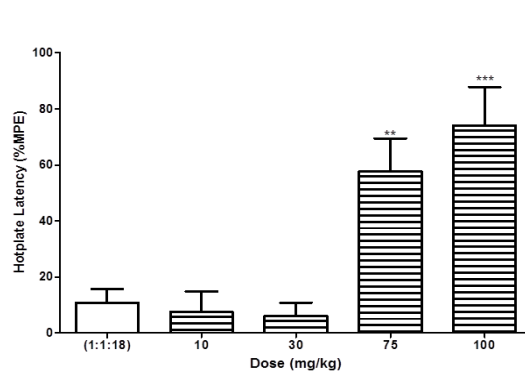

(b). Hotplate latency

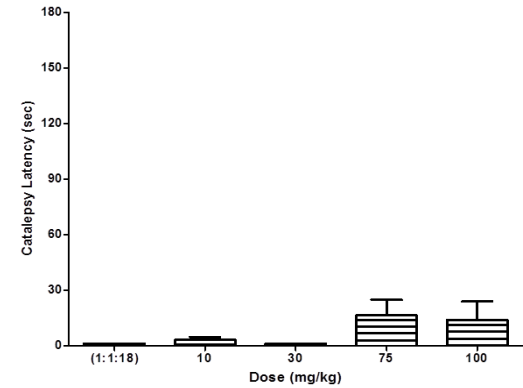

(c). Catalepsy latency

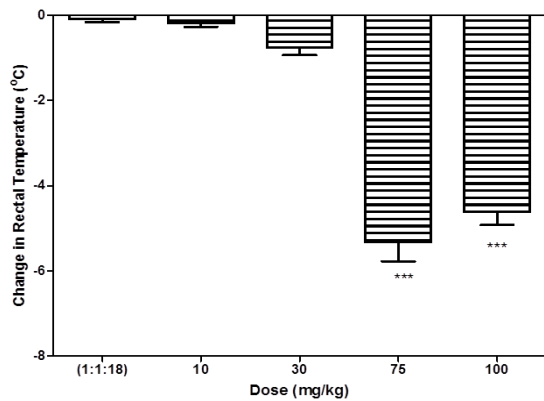

(d). Change in rectal temperature

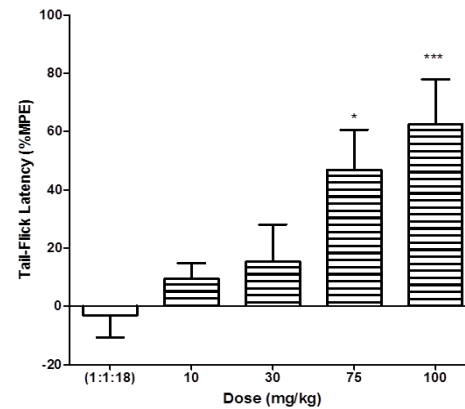

(e). Tail-flick latency

**Figure 34S.** *In vivo* mouse tetrad assay of basic partition of *N. nucifera*.

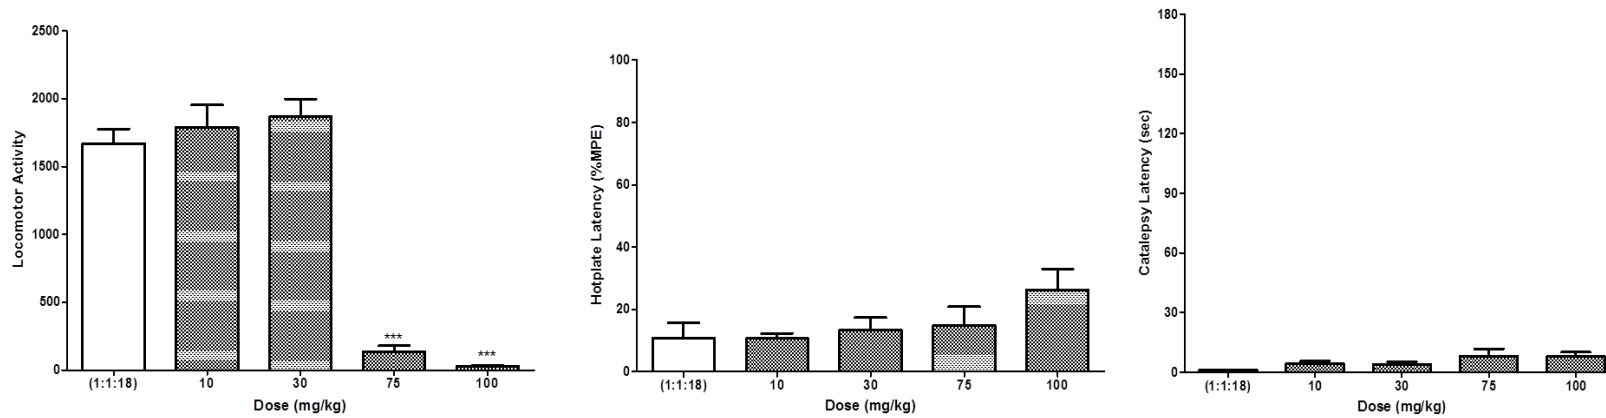

(a). Locomotor activity

(b). Hotplate latency

(c). Catalepsy latency

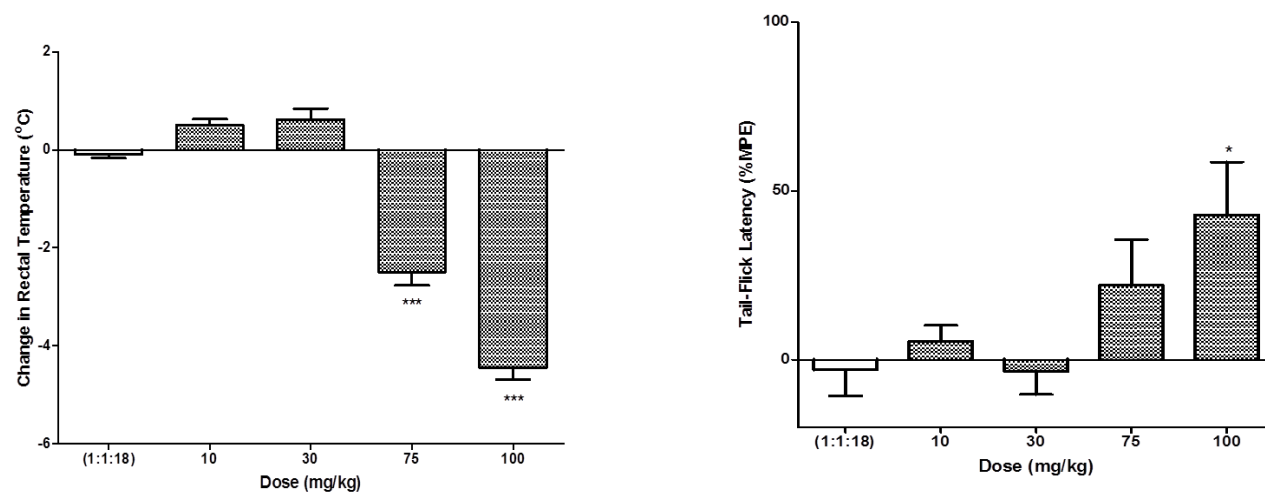

(d). Change in rectal temperature

(e). Tail-flick latency

**Figure 35S.** *In vivo* mouse tetrad assay of mixture of compound 5-7 of *N. nucifera*.

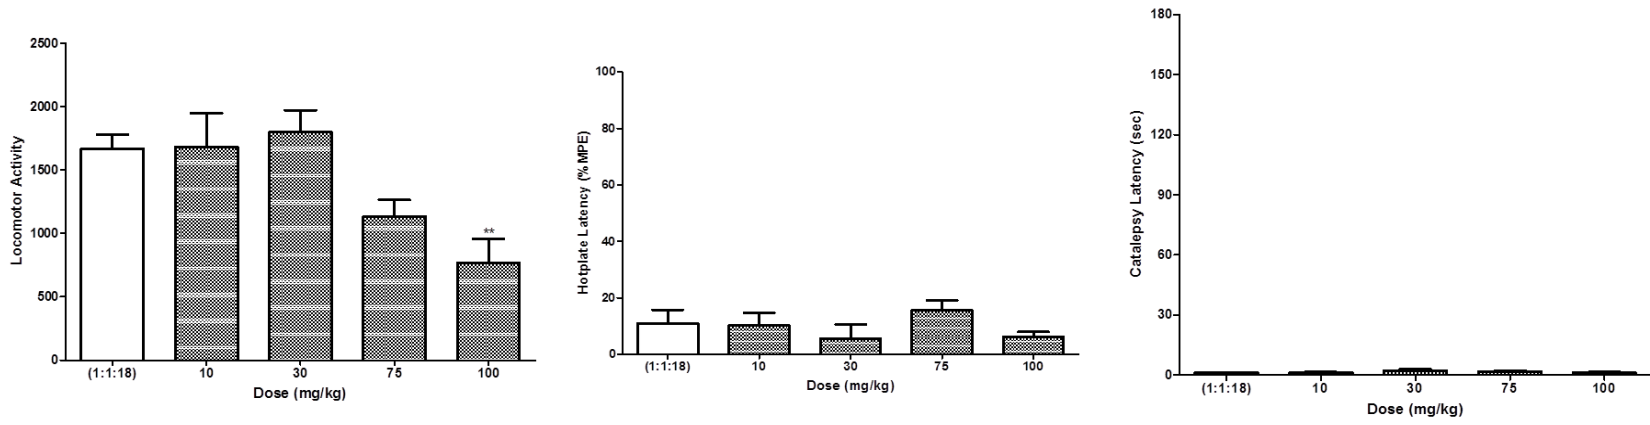

(a). Locomotor activity

(b). Hotplate latency

(c). Catalepsy latency

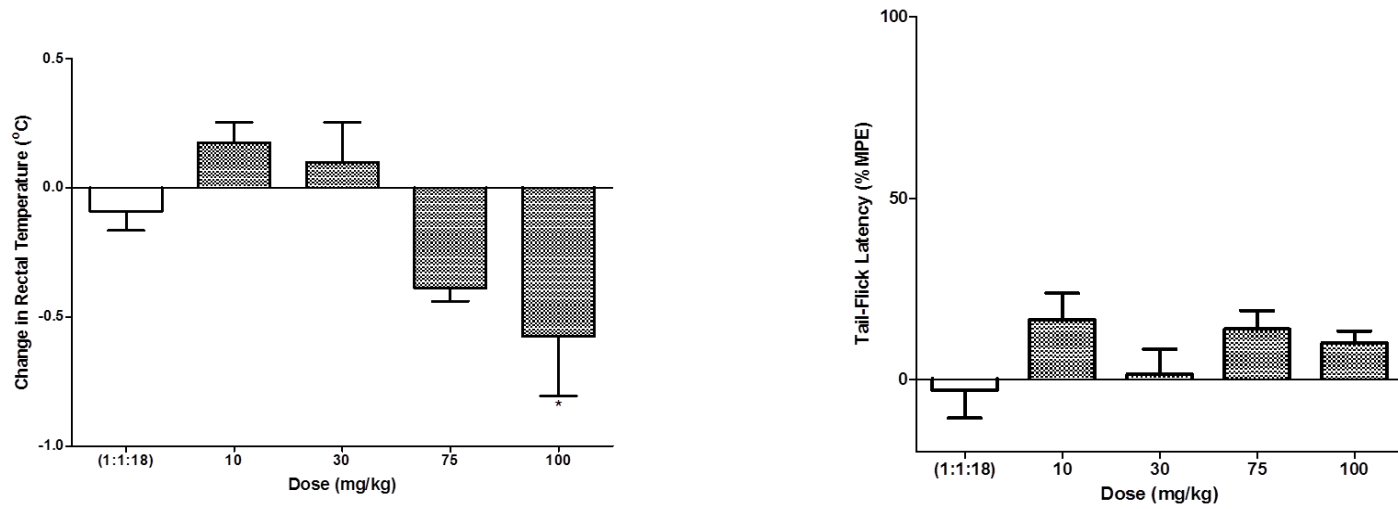

(d). Change in rectal temperature

(e). Tail-flick latency

**Figure 36S.** *In vivo* mouse tetrad assay of coclaurine (7).

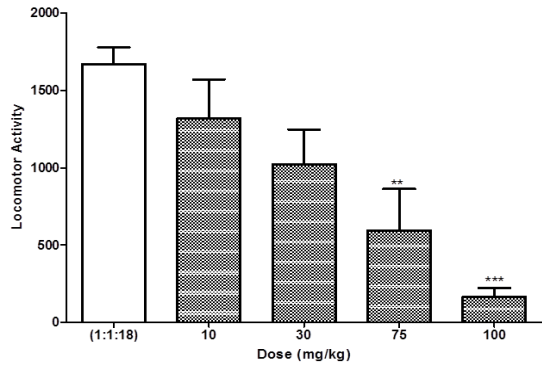

(a). Locomotor activity

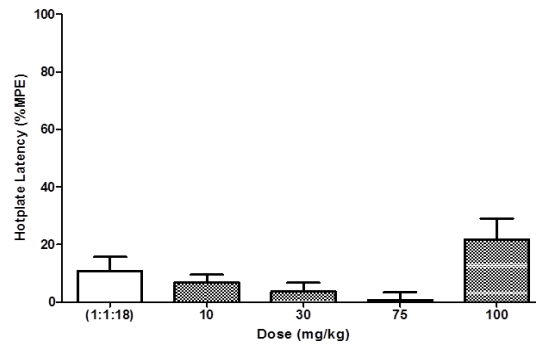

(b). Hotplate latency

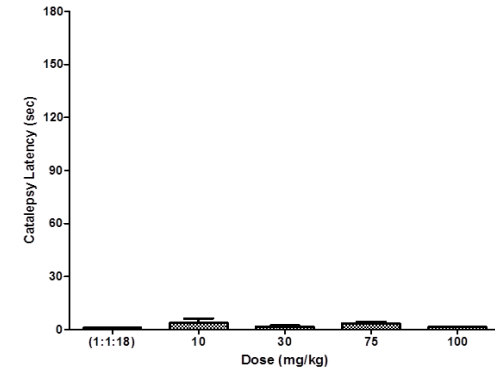

(c). Catalepsy latency

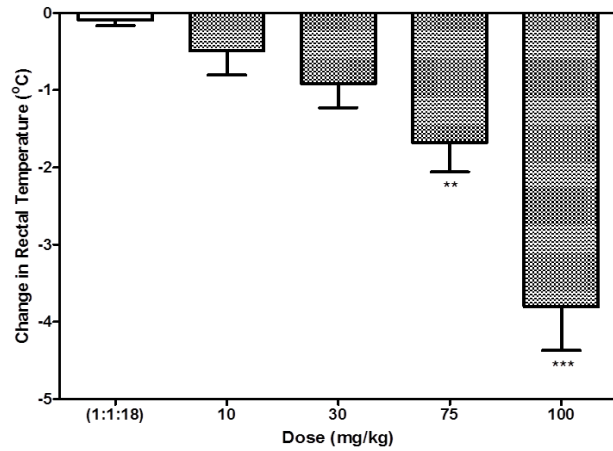

(d). Change in rectal temperature

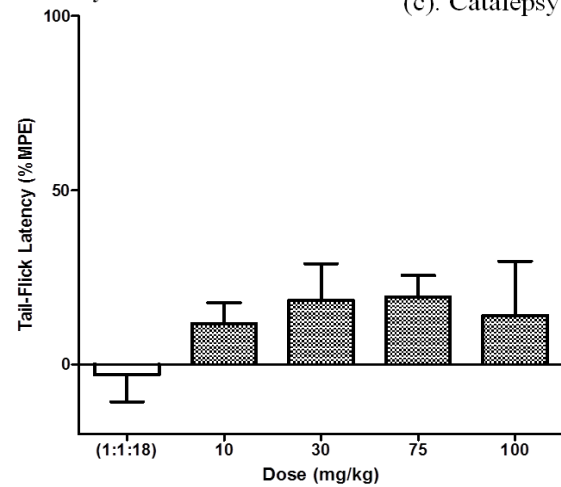

(e). Tail-flick latency

**Figure 37S.** *In vivo* mouse tetrad assay of nuciferine (**1**).

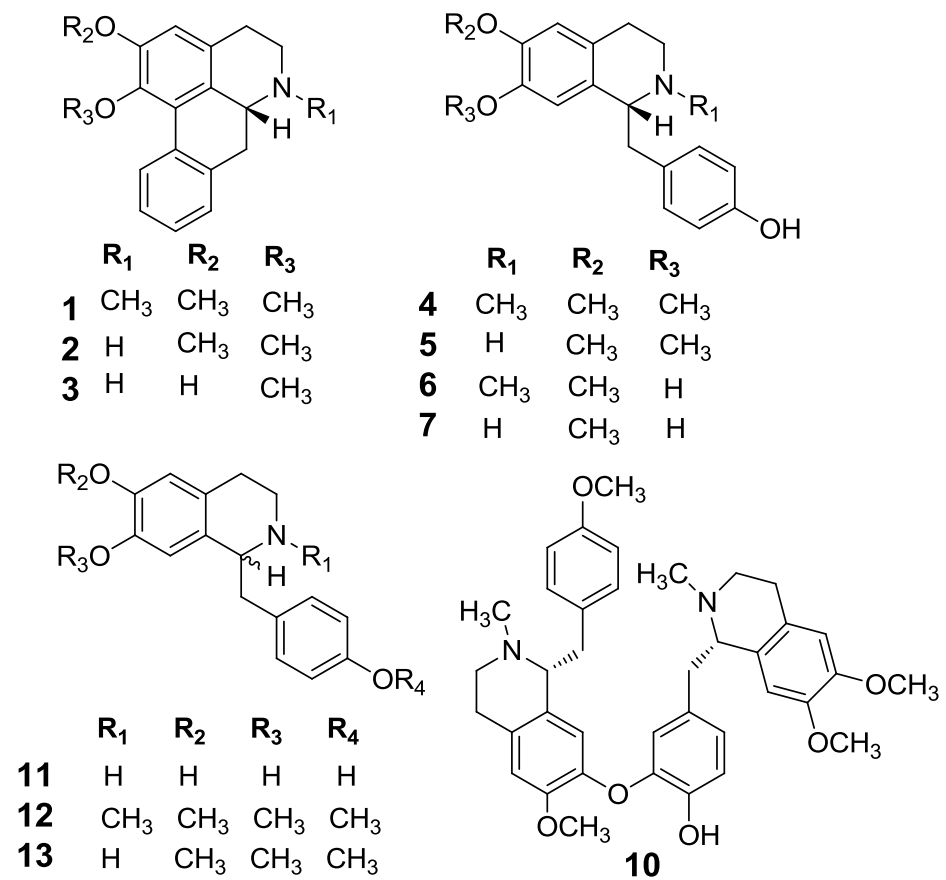

**Figure 38S.** Structure of alkaloids and their analogs from *N. nucifera*.
